# Supplementary material for: Aerosol dynamics and gas-particle conversion in dry deposition of inorganic reactive nitrogen in a temperate forest
Source: Copernicus journal article supplement (doi:10.5194/acp-2019-703), 2019-08-12
Supplement: Supplementary file [file acp-2019-703-AC4-supplement.zip]

# 1 Supplemental Figure

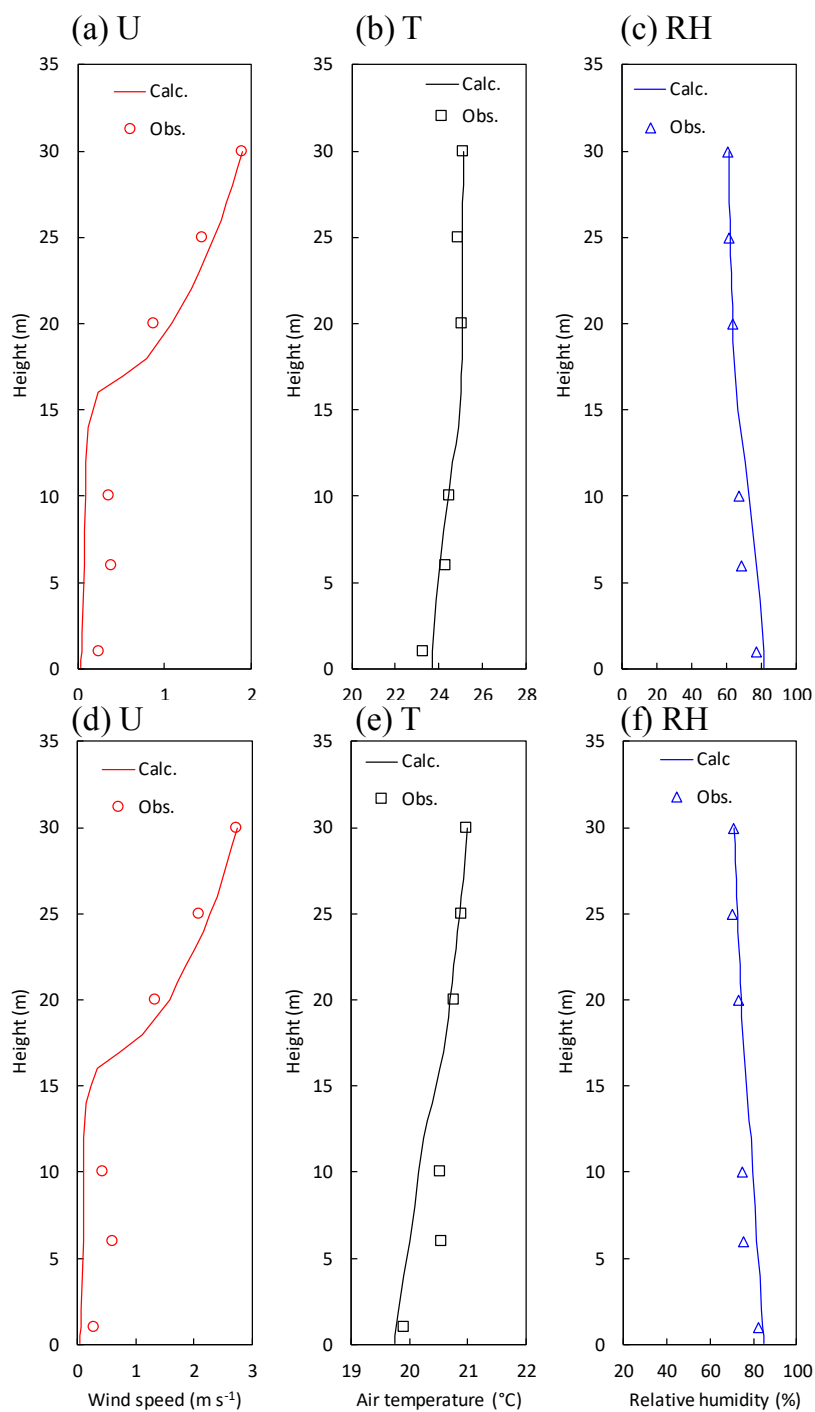

2  
3 Figure S1 Mean vertical profiles in observed and calculated (a) wind speed, (b) air temperature,  
4 and (c) relative humidity (a–c) during the daytime and (d–f) nighttime from 27 September to  
5 11 October 2016.

## Supplemental Table

Table S1 Simulation settings for the multi-layer atmosphere–SOiL–VEGetation model, SOLVEG.

| Item                                           | Value                                                                                                                  |
|------------------------------------------------|------------------------------------------------------------------------------------------------------------------------|
| Simulation periods                             | Early autumn (26 September to 11 October 2016);<br>Late autumn: 7 November to 7 December                               |
| Time step                                      | 6 s                                                                                                                    |
| Vegetation species                             | Broad-leaved forest ( <i>Quercus spp.</i> )                                                                            |
| Numbers of layers                              | 29, 20, and 7 for atmosphere, vegetation, and soil, respectively                                                       |
| Soil layer boundaries                          | 0.02, 0.05, 0.1, 0.2, 0.5, 1.0, and 2.0 m depth                                                                        |
| Vegetation layer boundaries                    | 0.05, 0.1, 0.2, 0.3, and 0.5 m (understory vegetation), and from<br>1 to 20 m (forest canopy) with an increment of 1 m |
| Atmospheric layer boundaries                   | At the vegetation layers and from heights of 21 to 29 m in<br>increments of 0.1 m                                      |
| Root fraction distribution                     | Constant from the surface to 0.5 m depth                                                                               |
| Characteristics length for leaf,<br>$d_{leaf}$ | 10 mm                                                                                                                  |
| Number of particle size bins                   | 30 bins from 0.003 to 3.5 $\mu\text{m}$ in diameter                                                                    |
| Porosity (saturated<br>content)                | water 0.43 $\text{m}^3 \text{m}^{-3}$                                                                                  |
| Soil texture                                   | Loam                                                                                                                   |
| Initial soil water content                     | 0.5 $\text{m}^3 \text{m}^{-3}$                                                                                         |
| Leaf area index (LAI) of trees                 | 4.3 (early autumn) and 3.6 $\text{m}^2 \text{m}^{-3}$ (late autumn)                                                    |
| Other parameters                               | Same as Katata et al. (2014)                                                                                           |

13   **References**

- 14   Katata G., Kajino M., Matsuda K., Takahashi A., Nakaya K. (2014). A numerical study of the  
15       effects of aerosol hygroscopic properties to dry deposition on a broad-leaved forest.  
16       Atmospheric Environment, 97, 501-510.

17
