# Supplementary material for: Aerosol dynamics and gas-particle conversion in dry deposition of inorganic reactive nitrogen in a temperate forest
Source: Copernicus journal article supplement (doi:10.5194/acp-2019-703), 2019-08-12
Supplement: Supplementary file [file acp-2019-703-AC4-supplement.zip]

# **Aerosol** ~~The effect of aerosol~~ dynamics and gas-particle conversion ~~in-on~~ dry deposition of inorganic reactive nitrogen in a temperate forest

Genki Katata<sup>1</sup>, Kazuhide Matsuda<sup>2</sup>, Atsuyuki Sorimachi<sup>3</sup>, Mizuo Kajino<sup>4</sup>, and Kentaro Takagi<sup>5</sup>

<sup>1</sup>Institute for Global Change Adaptation Science (ICAS), Ibaraki University, Ibaraki, 310-8512, Japan

<sup>2</sup>Tokyo University of Agriculture and Technology, 3-5-8 Saiwai-cho, Fuchu, Tokyo 183-8509, Japan

<sup>3</sup>Department of Radiation Physics and Chemistry, Fukushima Medical University, 1 Hikarigaoka, Fukushima, Fukushima 960-1295, Japan

<sup>4</sup>Meteorological Research Institute, Japan Meteorological Agency, Tsukuba, Ibaraki 305-0052, Japan

<sup>5</sup>Teshio experimental forest, Field Science Center for Northern Biosphere. Hokkaido University, Toikanbetsu, Horonobe, Hokkaido 098-2943, Japan

**Correspondence:** Genki Katata (genki.katata.mirai@vc.ibaraki.ac.jp)

**Abstract.** Although dry deposition has an impact on nitrogen status in the forest environments, the mechanism for high dry deposition rates of fine nitrate ~~aerosols~~ particles ( $\text{NO}_3^-$ ) observed in forests remains unknown and is a potential source of error in chemical transport models. Here we ~~developed a new~~ modified a multi-layer land surface model coupled with dry deposition and aerosol dynamics processes for a temperate mixed forest in Japan, so that we carried out its first application to the ammonium nitrate ( $\text{NH}_4\text{NO}_3$ ) gas-particle conversion (gpc) and aerosol water uptake of reactive nitrogen compounds. The processes of thermodynamics, kinetics, and dry deposition for mixed inorganic ~~aerosols~~ particles are modeled by a triple-moment modal method. The ~~new model~~ data of inorganic mass and size-resolved total number concentrations measured by filter-pack and electrical low pressure impactor in autumn was used for model input and numerical analysis. The model overall reproduces observed turbulent fluxes above the canopy and vertical micrometeorological profiles ~~, as well as~~ as our previous studies. The sensitivity tests with and without gpc demonstrated inorganic mass and size-resolved total number concentrations clearly changed within the canopy. ~~Sensitivity tests~~ The results also revealed that the within-canopy evaporation of ~~ammonium nitrate~~ ( $\text{NH}_4\text{NO}_3$ ) under dry conditions significantly enhances deposition flux for fine  $\text{NO}_3^-$  and  $\text{NH}_4^+$  ~~aerosols~~ particles, while reducing deposition flux for nitric acid gas ( $\text{HNO}_3$ ). As a result of evaporation of particulate  $\text{NH}_4\text{NO}_3$ , the calculated daytime mass flux of fine  $\text{NO}_3^-$  over the canopy were 15 times higher in gpc" scenario than "no gpc" scenario. This increase caused high contribution of particle deposition flux to total nitrogen flux over the forest ecosystem ( 38 %), while the contribution of  $\text{NH}_3$  was still large. A dry deposition scheme coupled with aerosol dynamics may be required to improve the predictive accuracy of chemical transport models for the surface concentration of inorganic reactive nitrogen.

## 1 Introduction

Dry deposition of inorganic reactive nitrogen gas (e.g.,  $\text{HNO}_3$  and  $\text{NH}_3$ ) and ~~aerosols~~-particle (e.g.,  $\text{NO}_3^-$  and  $\text{NH}_4^+$ ) is one of the important pathways of nitrogen ~~input~~ into forest ecosystems. ~~Recent studies at forests in In~~ East Asia, where air pollutant emissions continue to increase (EANET, 2016), ~~revealed that observed although the importance of dry deposition of inorganic reactive nitrogen is suggested by prior studies by indirect estimate studies (e.g., Pan et al., 2012; Li et al. 2013; Xu et al., 2015), direct measurement studies are still limited (Nakahara et al., 2019). Recent observational studies at forests revealed that~~ dry deposition flux of inorganic reactive nitrogen of fine  $\text{NO}_3^-$  was markedly higher than that expected from theory (Takahashi and Wakamatsu, 2004; Yamazaki et al., 2015; Honjo et al., 2016; Sakamoto et al., 2018; Nakahara et al., 2019). As long as physical deposition processes are dominant, the deposition velocities of  $\text{SO}_4^{2-}$  and  $\text{NO}_3^-$  ~~aerosols~~-particles are expected to be similar because both species exist in the same sub-micron size range (e.g., Wolff et al., 2011). However, Sakamoto et al. (2018) showed observed deposition velocity of  $\text{NO}_3^-$  as high as those of  $\text{HNO}_3$  at a temperate mixed forest, using the relaxed eddy accumulation method (Matsuda et al., 2015). Nakahara et al. (2019) also observed a higher concentration gradient of fine  $\text{NO}_3^-$  than of fine  $\text{SO}_4^{2-}$  at a cool-temperate forest, using a thermodynamic equilibrium model to explain this difference by evaporation of  $\text{NH}_4\text{NO}_3$  ~~aerosols~~-particles in the  $\text{NH}_4\text{NO}_3$ - $\text{NH}_3$ - $\text{HNO}_3$  triad within the canopy. Numerical studies of chemical transport models for the East Asian region have demonstrated that the models have overestimated total (gas + ~~aerosol~~particle) nitrate concentration at many locations (Kajino et al., 2013; Shimadera et al., 2018; Morino et al., 2015; Sakurai et al., 2015). Despite the many uncertain factors (e.g., the emission inventory; grid resolution; chemistry, physics, dynamics, and deposition modules), Shimadera et al. (2014) demonstrated that the surface concentration of total nitrate could be reproduced by increasing dry deposition velocity of  $\text{HNO}_3$  by a factor of twenty, in reference to past numerical studies. Hence, the deposition velocity of  $\text{NO}_3^-$  of fine ~~aerosols~~-particles and/or  $\text{HNO}_3$  is among the major uncertainties in the chemical transport modeling.

Modeling studies for dry deposition have demonstrated the importance of  $\text{NH}_4\text{NO}_3$  volatilization during dry deposition of gaseous and particulate nitrates (Brost et al., 1988; van Oss et al., 1998; Kramm and Dlugi, 1994), ~~although the process itself has already been known in the atmospheric chemistry community for a long time (Seinfeld and Pandis, 2006)~~. All these studies used the "big-leaf" concept for the canopy representation under steady-state and thermodynamic equilibrium assumptions, with chemical reaction rates provided by observational data. Nemitz and Sutton (2004) developed a more sophisticated model by introducing chemical timescales for a size-resolved ~~aerosol~~particle, and showed that the ~~thermodynamic~~ gas-particle conversion of  $\text{NH}_4\text{NO}_3$  (~~hereinafter referred as gpc~~) may explain the bi-directional fluxes observed above a Dutch heathland. However, several uncertainties remained in their model results due to uncertainties in empirical treatments of ~~aerosol~~-particle deposition and thermodynamic processes, and gas concentration assumed in equilibrium with the ~~aerosol~~-particle phase of pure  $\text{NH}_4\text{NO}_3$  (Nemitz and Sutton, 2004). Meanwhile, the equilibration of aerosols with surrounding liquid water is also important in determining the thermodynamic equilibrium of aerosols (e.g., Fountoukis and Nenes, 2007). An accurate evaluation of the impact of the  $\text{NH}_4\text{NO}_3$ - $\text{NH}_3$ - $\text{HNO}_3$  conversion within the canopy requires a process-based model that includes the thermodynamics of mixed inorganic aerosols, linking to gas-phase chemistry, while making no equilibrium assumption is required (Nemitz, 2015).

We here propose a new multi-layer land surface model coupled with dry deposition and aerosol dynamics (thermodynamics and kinetics of mixed inorganic aerosols) for forest environments. In aerosol dynamics modeling, the moment method is used to reduce computational cost and include general processes such as condensation, coagulation, below-cloud scavenging processes (e.g., Binkowski and Shankar, 1995), and dry deposition (Bae et al., 2009). These processes are implemented into a multi-layer atmosphere-SOIL-VEGetation model (SOLVEG) that includes particle (~~aerosol~~ and fog droplet ~~)~~-deposition and hygroscopic ~~aerosol~~-particle growth processes (Katata et al., 2014). We apply the model to a Japanese mixed forest for calibration and validation. Finally, we use numerical experiments to examine the impacts of two key processes on dry deposition flux over the canopy; gas-particle conversion of inorganic nitrogen compounds and hygroscopic growth.

## 2 Model description

### 2.1 Model overview

A one-dimensional multi-layer model SOLVEG model consists of four sub-models: atmosphere, soil, vegetation, and radiation within the vegetation canopy. The general description for gas and particle transport and dry deposition is available in Katata and Ota (2017). In the atmosphere sub-model, one-dimensional diffusion equations are solved between atmospheric layers for horizontal wind speeds, potential temperature, specific (relative) humidity, liquid water content of the fog, turbulent kinetic energy and length scale (Katata, 2009), and gas and ~~aerosol~~-particle concentrations (Katata and Ota, 2017). Observational data are used for the upper boundary conditions. Bulk transfer equations are applied at the lowest layer using the soil surface temperature and specific humidity calculated in the soil sub-model.

In the soil sub-model, the soil temperature, volumetric soil water content, and soil pore specific humidity are respectively predicted from heat conduction, mass balance in liquid water, and water vapor diffusion equations, respectively (Katata, 2009). Root water uptake is calculated from the transpiration rate in the vegetation sub-model. For soil CO<sub>2</sub>, mass conservation equations for liquid and gas phases are solved (Nagai, 2004). Organic matter dynamics are also considered (Ota et al., 2013); microbial decomposition and dissolved organic carbon (DOC) leaching in the above-ground litter layer, below-ground input of carbon from roots (root litter), and soil organic carbon (SOC) turnover and DOC transport along water flows throughout the soil profile for three SOC pools (active, slow, and passive) with different turnover times.

In the vegetation sub-model, profiles are predicted for leaf temperature, leaf surface water, and vertical liquid water flux (Nagai, 2004). The heat budget equation at the leaf surface is solved to predict leaf temperature using key variables from the atmosphere sub-model combined with the radiation scheme. At the upper boundary of the sub-model, a given precipitation intensity is used for calculating vertical liquid water flux within the canopy based on the surface water budget equation. The CO<sub>2</sub> assimilation rate due to photosynthesis is predicted using Farquhar's formulations (Farquhar et al., 1980) and stomatal resistance. In the radiation sub-model, direct and diffuse downward and upward fluxes of solar and long-wave radiation are calculated to obtain the radiation energy input at the canopy layers. Fractions of sunlit and shaded leaves at each canopy layer are adopted for the stomatal resistance and energy budget calculations.

A multi-layer snow module is unique in including the gravitational and capillary liquid water flows in the unsaturated snow layer based on van Genuchten's concept of water flow in the unsaturated zone (c.f., [Hirashima et al., 2010](#); Katata et al., [submitted 2019](#)). In the soil module, soil freeze-thaw processes based on the freezing-point depression equation are considered in heat conduction and liquid water flow equations. Winter-related processes for grassland phenology, such as leaf development and senescence due to cold stresses, are also implemented in the vegetation sub-model. Carbon gain from photosynthesis and remobilized reserves are allocated among sinks based on changing sink priorities and strengths. Sink strengths are calculated based on the dynamics of leaves and stems and the acclimation to low temperature. The removal of tillers and leaves by cutting can be simulated during the growing season, with subsequent regrowth of the sward. The regrowth rate after cutting is calculated at each phenological stage. Natural turnover of leaves and roots is modeled using typical life spans in years. Rooting depth and the fraction of roots in soil layers are modeled as functions of root biomass. Daily amounts of the dead root biomass (root litter) are used as inputs to SOC in the soil sub-model of SOLVEG.

## 2.2 Dry deposition

Since full descriptions for the dry deposition process of gases and particles are available in Katata et al. (2013; 2014) and Katata and Ota (2017), only the key equations are presented in the present subsection.

Using the compensation points for trace gases in the sub-stomatal cavity,  $\chi_s$  ( $\text{nmol m}^{-3}$ ), and above the leaf water surface,  $\chi_d$  ( $\text{nmol m}^{-3}$ ), we model bi-directional gas exchange fluxes ~~over~~ with stomata,  $F_{gs}$  ( $\text{nmol m}^{-2} \text{s}^{-1}$ ), and ~~over~~ with leaf water surfaces,  $F_{gd}$  ( $\text{nmol m}^{-2} \text{s}^{-1}$ ), for each canopy layer (Katata et al., 2013) as follows:

$$F_{gs} = a(D_{gas}/D_w)R'^{-1}[(r_b + r_d)\chi_s - r_b\chi_d - r_d\chi_a], \quad (1)$$

$$F_{gd} = a(D_{gas}/D_w)R'^{-1}[(r_b + r_s)\chi_d - r_b\chi_s - r_s\chi_a], \quad (2)$$

where  $a$  is the leaf area density ( $\text{m}^2 \text{m}^{-3}$ ),  $D_{gas}$  and  $D_w$  are the diffusivities ( $\text{m}^2 \text{s}^{-1}$ ) of trace gas and water vapor,  $r_b$ ,  $r_s$ , and  $r_d$  are the resistances ( $\text{s m}^{-1}$ ) for leaf boundary layer, stomata, and the evaporation (cuticular),  $\chi_a$  is the ambient gas concentration ( $\text{nmol m}^{-3}$ ) in the canopy layer, and  $R' = (r_b r_s + r_b r_d + r_s r_d)$ . The total gas exchange flux over the leaves can be calculated as the sum of  $F_{gs}$  and  $F_{gd}$  for all canopy layers. In accordance with a number of observations (e.g., Huebert and Robert, 1985), all  $\chi_s$ ,  $r_d$ , and  $r_s$  are set to be zero for highly reactive and water-soluble gas species of  $\text{HNO}_3$  and  $\text{HCl}$ , i.e., perfect absorption by plant canopies. For both species, the parameterization for a deciduous forest by Meyers et al. (1989) is used to calculate  $r_b$ . For  $\text{NH}_3$ ,  $\chi_s$  is calculated based on the thermodynamic equilibrium between  $\text{NH}_3$  in the liquid and gas phases ÷

([Nemitz et al., 2000](#); [Sutton et al., 1994](#)):

$$\chi_s = \frac{161500}{T_c} \exp\left(\frac{10378}{T_c}\right) \Gamma_s, \quad (3)$$

where  $T_c$  is the canopy temperature ( $^{\circ}\text{C}$ ),  ~~$\chi_s$~~   $\Gamma_s$  is the stomatal emission potential (also known as the apoplastic ratio) at 1013 hPa. ~~The~~ (Nemitz et al., 2004). Meanwhile, the  $\text{NH}_3$  concentration at the leaf surface water ( $\chi_d$ ) is calculated by assuming

Henrys Law and dissociation equilibrium with the atmospheric concentration of  $\text{NH}_3$  at each canopy layer. To calculate the  
 115 exchange flux of  $\text{SO}_2$  and  $\text{NH}_3$  over the wet canopy, the following empirical formula for  $r_d$  is applied (Massad et al., 2010):

$$r_d = 31.5AR^{-1} \exp[b(100 - RH)], \quad (4)$$

where  $b$  is the constant,  $RH$  is the relative humidity (%) and  $AR$  is the ratio of total acid/ $\text{NH}_3$ , represented as  $(2[\text{SO}_2] + [\text{HNO}_3] + [\text{HCl}])/[\text{NH}_3]$  at each atmospheric layer. The value of  $AR$  is determined from calculations of gaseous inorganic concentration at each atmospheric layer. Since the affinity (such as solubility on water) of  $\text{SO}_2$  for the leaf surface is approx-  
 120 imately twice that of  $\text{NH}_3$  (van Hove et al., 1989), a half value of  $r_d$  calculated by Eq. (4) is applied to  $\text{SO}_2$  deposition. The  $RH$  value could be affected by the leaf surface water content predicted at each canopy layer, based on water balance due to evaporation of leaf surface water, interception of precipitation by leaves, capture of fog water by the leaves, and the drip from leaves (Katata et al., 2008; 2013). Since our model is not the dynamic modeling approach (e.g., Sutton et al., 1998; Flechard et al., 1999) to simulate  $\text{NH}_3$  charging and discharging of the cuticle, Eq. (4) could have uncertainty at wet canopy in equilibrium  
 125 with non-zero leaf surface concentration of  $\text{NH}_3$ .

The exchange flux of  $\text{NH}_3$  over the ground ( $F_{g0}$ ) was described with compensation points at the ground ( $\chi_{a0}$ ) as

$$F_{g0} = (D_{gas}/D_w)c_{H0}(\chi_{a0} - \chi_g), \quad (5)$$

$$\chi_g = \frac{161500}{T_{s0}} \exp\left(\frac{10378}{T_{s0}}\right) \Gamma_g, \quad (6)$$

where  $c_{H0}$  is the surface exchange coefficient for heat,  $\chi_{a0}$  is the  $\text{NH}_3$  concentration at the bottom of the atmospheric layer,  $T_{s0}$  is the soil surface temperature, and  $\Gamma_g$  is the emission potential at the ground surface.  
 130

As explained in Katata et al. (2014), the aerosol-particle deposition rate  $F_p$  ( $\mu\text{g m}^{-2} \text{s}^{-1}$  or  $\# \text{m}^{-2} \text{s}^{-1}$ ) of each inorganic species in each canopy layer is represented as

$$F_p = aE_p(D_p), \quad (7)$$

$$E_p = \varepsilon(D_p)F_f|\mathbf{u}|c_p(D_p), \quad (8)$$

135 where  $E_p$  is the capture of aerosols-particles by leaves ( $\mu\text{g m}^{-3} \text{s}^{-1}$  or  $\# \text{m}^{-3} \text{s}^{-1}$ );  $\varepsilon$  the total aerosol-particle capture efficiency of plant leaves for aerosols-particles by inertial impaction -(Peters and Eiden, 1992), gravitational settling, Brownian diffusion -, and interception- (Kirsch and Fuchs, 1968), and interception (Fuchs, 1964; Petroff et al., 2009);  $F_f$  is the shielding coefficient for aerosols-particles in the horizontal direction;  $|\mathbf{u}|$  the horizontal wind speed ( $\text{m s}^{-1}$ ) at each canopy layer; and  $c_p$  is the mass or number concentration of aerosols-particles ( $\mu\text{g m}^{-3}$  or  $\# \text{m}^{-3}$ ).  $E_p$ ,  $\varepsilon$ , and  $c_p$  are integration values of given size  
 140 bins with particle diameter ( $D_p$  [ $\mu\text{m}$ ]).

## 2.3 Aerosol dynamics

In order to simulate changes in ~~aerosol-partiele~~particle particle sizes due to condensation, evaporation, and water uptake, a triple-moment modal method (Kajino et al., 2012) is employed at each atmospheric layer in SOLVEG. ~~Aerosols~~Particles are grouped into fine (accumulation) and Aitken mode with the size distribution prescribed by a lognormal function; while the  
145 coarse mode is not considered in the simulation. The lognormal function is identified by three parameters: number concentration ( $N$  [ $\# \text{ m}^{-3}$ ]), geometric mean diameter ( $D_g$  [ $\mu\text{m}$ ]), and geometric standard deviation ( $\sigma_g$ ). The triple-moment method predicts spatiotemporal changes in three moments ( $k$ ) to identify the changes in the shape of each mode's lognormal size distribution. The selected three moments are 0th, 2nd, and 3rd moments ( $M_0$ ,  $M_2$ , and  $M_3$ ), which are respectively number ( $N$ ), surface area ( $\text{m}^2 \text{ m}^{-3}$ ), and volume concentrations ( $\text{m}^3 \text{ m}^{-3}$ ).  $D_g$  values for each moment are named  $D_{g0}$ ,  $D_{g2}$ , and  $D_{g3}$ . The  
150 relationship of the above lognormal parameters and the three moments for each atmospheric layer are as follows:

$$M_k = N D_{g0}^k \exp \left[ \frac{k^2}{2} \ln^2 \sigma_g \right], \quad (9)$$

$$D_{g0} = \left[ \frac{M_2}{M_0} \right]^{\frac{3}{2}} \left[ \frac{M_3}{M_0} \right]^{-\frac{3}{2}}, \ln^2 \sigma_g = -\ln \left[ \frac{M_2}{M_0} \left( \frac{M_3}{M_0} \right)^{-\frac{2}{3}} \right]. \quad (10)$$

~~Aerosol~~Particle growth is dynamically solved in the same manner of Kajino et al. (2012). The gas to ~~aerosol~~particle mass transfer is ~~accelerated~~driven by the difference between the current state and the thermodynamic equilibrium state, as simulated  
155 by ISORROPIA2 model (Fountoukis and Nenes, 2007) for semi-volatile inorganic components such as  $\text{NO}_3^-$ ,  $\text{NH}_4^+$ ,  $\text{Cl}^-$ , and liquid water ( $\text{H}_2\text{O}$ ). The gas-phase chemical production of  $\text{HNO}_3$  could affect the simulated  $\text{HNO}_3$  concentration and flux, which should be implemented to the model in future. The gas-particle conversion of organics is not considered in the present study because the observational speciation data was not available. Thus, both organics and other components to total mass was assumed to be hydrophobic aerosols in the simulation. Since the current study focuses on change in mass gain/loss  
160 of accumulation mode aerosols, coagulation processes are not included in the simulation. Brownian coagulation is critically important for the prediction of number concentration of Aitken mode ~~aerosols~~particles, but not very important for the prediction of accumulation mode ~~aerosol~~particle mass (e.g., Kajino et al., 2013).

## 3 Simulation setup

### 3.1 Study site and observational data

165 We used the measurements at an observation tower in a mixed forest namely the Field Museum Tamakyuryo (FM Tama) of the Tokyo University of Agriculture and Technology, located in a western suburb of Tokyo, Japan ( $35^\circ 38' \text{N}$ ,  $139^\circ 23' \text{E}$ ). Deciduous tree species (*Quercus* spp.) are dominant around the meteorological tower along with some Japanese cedar (*Cryptomeria japonica*). The canopy height around the tower is approximately 20 m. The growth period of deciduous trees is typically from April to December. Site description details are provided by Matsuda et al. (2015) and Yamazaki et al. (2015).

170 Simulations were carried out in two experimental periods in the early autumn (26 September to 11 October 2016) and the late autumn (7 November to 7 December 2016). In the early autumn period, daytime (8:00-17:00 in local time) and nighttime (17:00-8:00 in local time) mean concentrations were available at five heights (1, 8, 16, 23, and 30 m) for inorganic gases, with fine ~~aerosol~~-particle concentrations observed using a 4-stage filter-pack sampling system. System specifications were same as those of Nakahara et al. (2019) except for the ~~aerosol~~-particle filter material. This study used a glass fiber filter coated with Teflon for collecting fine and coarse ~~aerosols~~. Sampling particles. For the early autumn period, filter-pack sampling was continuously performed during the day and night except when it was raining. ~~We obtained~~ As a result, 5 daytime ~~reading~~ data sets and 6 nighttime ~~data sets~~. ~~reading data sets were available. The gaps between data in rain days of the early autumn period were linearly incorporated for simulations. Since the interpolation could cause unrealistic effects on the results, we used only the calculations and measurements in the above no rain period for comparisons of inorganic mass concentration. For the late~~

180 ~~autumn period, the time resolution was relatively low as weekly continuous measurements.~~ After the samples were collected, inorganic ions in each of the filters were extracted into deionized water by ultrasonic extraction, and then analyzed using ion chromatography (Dionex ICS-1100, Thermo Scientific).

In the ~~early~~-only late autumn period, measurements of particle number concentrations were taken during the daytime (10:00-16:00) for 7 days without rainfall. Airborne particle number concentrations were measured by an electrical low pressure impactor (ELPI+, Dekati Ltd.). In the ELPI+, sampled particles are charged by corona discharge and later separated by size using the principle of inertial classification in a 13-stage cascade low-pressure (40 hPa) impactor combined with a back-up filter stage. During the collection process, the charged particles produce a current proportional to their respective number concentrations. The broad particle size distribution domain measured by the ELPI+ ranges from 6 nm to 10  $\mu\text{m}$ . More details on the ELPI+ are described in Järvinen et al. (2014). The ~~aerosol~~-particle sample inlets for the ELPI+ were placed at heights of 30, 23, 17, 8, and 1 m at the tower through TYGON intake tubing of 7.94 mm inner diameter and respective lengths of 6, 5, 10, 20, and 25 m. Each sampling line for the 5 measuring heights was manually switched every two minutes. The transit times for ~~aerosol~~-particle samples in the tubing at each height ranged between 2 and 12 s. Results of the first minute of concentration measurement were rejected in order to avoid the mixing of air samples derived from different heights. All data were stored in a personal computer at a sampling rate of  $1\text{ s}^{-1}$ . The raw data were averaged over intervals of 60 s and were later used for calculating 600 s mean vertical profiles. Particle penetration efficiencies of the sampling tubes were estimated using the indoor ~~aerosols~~-particles in the laboratory by changing the lengths of the sampling tubes (30, 20, 15, 10, and 5 m). Based on these results, the raw concentrations have been corrected prior to post-processing. Furthermore, the data were further screened out according to a few selection criteria to ensure their credibility with respect to three uncertainties in particular: uncertainty in number concentration measurements, signal to noise ratio (Deventer et al., 2015), and variation in background current (the signal obtained from particle-free air through a HEPA-filter for each particle stage) before and after the measurements.

195  
200

Half-hourly meteorological data for horizontal wind speed, and air temperature and humidity at heights of 30, 25, 20, 10, 6, and 1 m at the tower were used for model input and validation. Incoming short-wave and long-wave radiation values at 30 m were used for model input, while ~~the latter~~-incoming long-wave radiation was estimated by the parameterization of Duarte et al. (2006). Net radiation was measured using a net radiometer (Q7, REBS) and stored by a data-logger (CR10X, Campbell



Scientific) as half-hourly means. A sonic anemometer (81000, Young) was used to measure the 3D wind velocities and air temperature, and an enclosed infrared CO<sub>2</sub>/H<sub>2</sub>O gas analyzer (LI-7200, Li-Cor) was used to measure the molar fraction of CO<sub>2</sub> and H<sub>2</sub>O. These data were sampled at a frequency of 10 Hz with the interface unit (LI-7550, Li-Cor). Half-hourly CO<sub>2</sub>, heat, and momentum fluxes were calculated using Eddy Pro software (ver. 4.2.0, Li-Cor), where double rotation (Kaimal and Finnigan, 1994) and block averaging were applied to the fluctuation data to calculate the covariances. We then corrected the effect of air density fluctuations on the flux values (Burba et al., 2012). Low-frequency losses (Moncrieff et al., 2004) and high-frequency losses for the low-pass filtering (Ibrom et al., 2007) and for the sensor separation (Horst and Lenschow, 2009) were corrected. All raw flux data were checked following the quality-control program proposed by Vickers and Mahrt (1997). Then we applied the quality check system proposed by Mauder and Foken (2006), and excluded data of low quality (qc-flag of 2).

The total (one-sided) leaf area index (LAI) measured with a plant canopy analyzer (LAI-2200, Li-cor) were 4.3 and 3.6 m<sup>2</sup> m<sup>-2</sup> for October and November 2016, respectively. Vertical profiles of leaf area density (LAD) were provided in order to obtain the above values of total LAI by interpolated by gamma function interpolation, with the maximum at a height of 15 m following the way of Katata et al. (2013). LAI of the understory vegetation of 0.5 m in height was given as a typical value of 2.0 m<sup>2</sup> m<sup>-2</sup> due to lack of observational data.

### 3.2 Boundary and initial conditions

The boundaries of the vegetation layers were set at heights of 0.05, 0.1, 0.2, 0.3, and 0.5 m (understory vegetation), and from 1 to 20 m (forest canopy) with an increment of 1 m, while atmospheric layers were extended from the 20 m canopy to 30 m with an increment of 1 m. Half-hourly data for precipitation, atmospheric pressure, horizontal wind speed, air temperature and humidity, and incoming long- and short-wave radiation were applied to the top atmospheric layer. Inorganic mass concentrations of gases (SO<sub>2</sub>, NH<sub>3</sub>, HNO<sub>3</sub>, and HCl) and PM2.5 ~~aerosols-particles~~ (SO<sub>4</sub><sup>2-</sup>, NO<sub>3</sub><sup>-</sup>, NH<sub>4</sub><sup>+</sup>, Na<sup>+</sup>, Cl<sup>-</sup>, Ca<sup>2+</sup>, K<sup>+</sup>, Mg<sup>2+</sup>) measured by filter-pack were linearly interpolated at half-hourly timescales. For Aitken mode, the inorganic mass concentration was assumed to be one-tenth of that of fine mode, based on size-resolved number concentrations from ELPI+ observations (not shown in figures). The boundaries of the soil layers were 0.02, 0.05, 0.1, 0.2, 0.5, 1.0, and 2.0 m in depth. Constant values for soil temperature (15 °C) and saturated volumetric water content for typical loam soil texture (0.43 m<sup>3</sup> m<sup>-3</sup>) were taken from Katata and Ota (2017). The model setup and parameters were provided in Table S1.

The boundary conditions and input data for simulation setup are summarized in Table 1. The lognormal parameter sets of ( $D_{g3}$ ,  $\sigma_g$ ) for fine and Aitken modes at the upper boundary condition were respectively set at (0.089 μm, 2.1) and (0.26 μm, 2.0) ~~;-based-on-observational-results-in-urban-environments-in-autumn-(Salma-et-al.,-2011).-This-size-distribution-was-similar-to-that-observed-at-a~~ based on manual fitting of ELPI+ measurements at 30 m height ~~by-ELPI+-systems-(Fig. 1a). The~~ These parameter sets were applied to both the early and late autumn periods. In order to simulate the vertical profiles of total number concentration within the canopy, the volume fraction of inorganic compounds,  $f_{io}$ , ~~lacks-an-observational-data-basis;-and-was-set-at-0.2-and-0.12,-respectively,-was-given-by-the-data-of-total-inorganic-mass-and-total-number-concentration. For the late autumn period, temporal changes in weekly  $f_{io}$  values~~ for fine and Aitken modes ~~;-in-order-to-simulate-the-total-number~~



concentration observed by was given by the data of filter-pack and ELPI+ measurements at a height of 30 m in the late autumn period. Since no ELPI+ data are available. However, for the early autumn period, the ELPI+ measurements were unavailable as described in last subsection. Therefore, temporal changes in  $f_{io}$  (Fig. 1b) were set based on the filter-pack data at the study site and total PM<sub>2.5</sub> mass concentrations observed at the nearest air quality monitoring station at Hachiouji (3 km west-north-west from the site). For both periods,  $f_{io}$  for Aitken mode was assumed to be the same as that for fine mode, since again no observational data were available. As a result, the summed volume for both organics and other components varied from 40 and 80 % of the total volume.

Since no data were available in the study site for emission potentials of NH<sub>3</sub> at the ground surface ( $\chi_g$ ) and stomata ( $\chi_s$ ), we used typical values of  $\chi_g \Gamma_g = 300$  ppb (Massad et al., 2010) and  $\chi_s \Gamma_s = 2000$  ppb for forests (Neiryck and Ceulemans, 2008).

In this study, we made a simulation with basic and less time-resolved datasets as very first application of the model to the NH<sub>4</sub>NO<sub>3</sub> gas-particle conversion and aerosol water uptake of reactive nitrogen compounds. The above uncertainties associated with input data such as number concentration and particle size distribution should be improved in future.

### 3.3 Simulation scenarios

To reveal the impacts of each process of NH<sub>4</sub>NO<sub>3</sub> equilibrium gas-particle conversion and hygroscopic growth, the following four simulation scenarios were adopted: 1) NH<sub>4</sub>NO<sub>3</sub> equilibrium gas-particle conversion and aerosol water uptake ("gpc" scenario), 2) aerosol water uptake but no NH<sub>4</sub>NO<sub>3</sub> equilibrium gas-particle conversion ("no gpc" scenario), 3) NH<sub>4</sub>NO<sub>3</sub> equilibrium gas-particle conversion but no aerosol water uptake ("gpc dry" scenario), and 4) no NH<sub>4</sub>NO<sub>3</sub> equilibrium gas-particle conversion and no aerosol water uptake ("no gpc dry" scenario). Calculations in all scenarios were compared with observations of vertical profiles of total number and inorganic mass concentrations within the canopy.

## 4 Results

### 4.1 Micrometeorology during autumn 2016

Temporal changes in friction velocity, net radiation, sensible and latent heat, and CO<sub>2</sub> flux over the canopy for the early autumn and the late autumn periods are shown in Fig. 2-Figs. 2 and 3, respectively. Overall, the modeled momentum and heat fluxes agreed with observed values, while observed high values of friction velocity in November and December 2016 were slightly underestimated (Fig. 2f3a). Water vapor and CO<sub>2</sub> exchange processes that determine the level of stomatal uptake of gases were also reproduced well by the model (Fig. 2e, e, h, and j Figs. 2 and 3; c and e).

Figure 3-Figures 4 and 5 illustrates time series for horizontal wind speed, air temperature, and relative humidity under the canopy in both simulation periods. Wind speed was underestimated within the forest, as was friction velocity (Fig. 3a and d), probably due to horizontal advection over the hilly terrain (Matsuda et al., 2015). Nevertheless, For calculated air temperature and humidity, the primary determinants of ambient conditions of gas-particle conversion and aerosol hygroscopic growth, were

270 reproduced by the model (Fig. 3b, c, e, and f) calculated temporal changes were closed to the observations within the canopy (Figs. 3 and 4; b and c). The above features were found in mean vertical profiles during the daytime and nighttime (Fig. S1).

## 4.2 Inorganic mass concentration and flux in early autumn in 2016

Figure 4a-6a and b shows time series for observed and calculated major inorganic nitrogen compounds ( $\text{HNO}_3$  and  $\text{NH}_3$  gases and  $\text{NO}_3^-$ , and  $\text{NH}_4^+$  fine aerosols particles) under the canopy in the early autumn period. The difference between "gpc" and "no gpc" scenarios was substantial for  $\text{HNO}_3$  and fine  $\text{NO}_3^-$  concentrations during the daytime on 28 September. In the "gpc" scenario,  $\text{HNO}_3$  concentration increased due to evaporation of  $\text{NH}_4\text{NO}_3$  during the daytime, while  $\text{NO}_3^-$  concentration decreased. As a result, strong variations in  $\text{NO}_3^-$  mass concentration was reproduced in the "gpc" scenario. Less impact of evaporation of  $\text{NH}_4\text{NO}_3$  on both  $\text{NH}_3$  and fine  $\text{NH}_4^+$  concentrations was observed.

The calculated fine mode mass-based wet diameter ( $D_{g3}$ ) and  $RH$  are shown in Fig. 4e6c. Hygroscopic growth has a large impact on aerosol-particle size distributions in comparisons between "no gpc" and "no gpc dry" scenarios; e.g.,  $D_{g3}$  values in the latter were higher as  $1.4 \mu\text{m}$  than those in the former as  $0.4 \mu\text{m}$  during the nighttime on 29 September 2016. Although this process also influenced the size distribution during the daytime, competing shrinkage mechanism,  $\text{NH}_4\text{NO}_3$  evaporation, appeared in the "gpc" scenario. As a result, the difference in daytime  $D_{g3}$  between "gpc" and "no gpc" scenarios was up to in  $0.12 \mu\text{m}$  on 28 September.

Figure 5-7 depicts vertical profiles of normalized gaseous and particulate mass concentrations in the early autumn period. The model profiles averaged for only the sampling periods were compared with observed ones. In the "no gpc" scenario (Fig. 5b7b), vertical gradients of fine aerosol-particle compounds ( $\text{SO}_4^{2-}$ ,  $\text{NO}_3^-$ , and  $\text{NH}_4^+$ ) were similar, since the same equations for deposition velocity of Eqs. (5) and (6) were equation for collection efficiency of Eq. (8) was used for all inorganic aerosol particle compounds. In contrast, vertical gradients of  $\text{NO}_3^-$  and  $\text{NH}_4^+$  concentrations drastically increased due to  $\text{NH}_4\text{NO}_3$  evaporation in the "gpc" scenario (Fig. 5e-7c and f), producing gradients similar to observed gradients (Fig. 5a-7a and d). The above feature was also apparent in vertical profiles of mass flux for all inorganic nitrogen components during the daytime (Fig. S2). The impact of  $\text{NH}_4\text{NO}_3$  evaporation was smaller during the nighttime (Fig. 5e7c) than the daytime (Fig. 5f7f), which also aligns with observed diurnal patterns (Fig. 5a-7a and d). High values of observed fine  $\text{SO}_4^{2-}$  concentration were reproduced calculated in both scenarios (Fig. 5ae7a-c).

Figure 6-8 shows time series for calculated apparent mass flux of  $\text{HNO}_3$ ,  $\text{NH}_3$ , and fine  $\text{NO}_3^-$  and  $\text{NH}_4^+$  over the canopy for "gpc" and "no gpc" scenarios. The actual deposition flux of each component by forest (ecosystem flux) was also shown for comparisons with apparent flux. The impact of  $\text{NH}_4\text{NO}_3$  evaporation on fluxes was the highest from 26 to 29 September. Calculated  $\text{NO}_3^-$  flux above the canopy was positive during the nighttime for several days (Fig. 5e8c) due to condensation of  $\text{HNO}_3$  (Fig. 5a8a). As is the case for in-canopy  $\text{NH}_3$  concentration (Figs. 4-and-56 and 7),  $\text{NH}_4\text{NO}_3$  evaporation has less impact on  $\text{NH}_3$  flux than other species (Fig. 6b8b).

### 4.3 Aerosol-Particle size distribution in late autumn 2016

Figure 7-9 shows time series for number concentration within the canopy in the late autumn period, as well as parameters for a lognormal size distribution for fine mode. Initial number concentration values on 7 November (Fig. 7a9a) were tuned via adjustments of the ratio of inorganic compounds ( $f_{io}$ ) for each mode. Below-canopy  $D_{g3}$  and  $\sigma_g$  were smaller in "gpc dry" than in "no gpc dry" due to  $\text{NH}_4\text{NO}_3$  evaporation (Fig. 7b-9b and d), while below-canopy  $D_{g0}$  was larger in "gpc dry" than in "no gpc dry" (Fig. 7e9c). In the "gpc" and "no gpc" scenarios in which aerosol water is considered,  $D_{g3}$  increased due to hygroscopic growth, while the influence of  $\text{NH}_4\text{NO}_3$  equilibrium-gas-particle conversion on  $D_{g3}$  was still apparent (Fig. 7b9b). Some discrepancies between observations and calculations were found after 25 November 2016 in temporal changes in number concentration (Fig. 7a9a).

Figure 8-10 shows vertical profiles of parameters for a lognormal size distribution and normalized  $\text{NO}_3^-$  mass concentration in "no gpc" and "gpc" scenarios. For fine aerosols-particles, values of  $D_{g3}$  and normalized  $\text{NO}_3^-$  concentration at 8 m were respectively 5.1 % and 8.9 % smaller in the "gpc" scenario than in the "no gpc" scenario due to evaporation of  $\text{NH}_4\text{NO}_3$  (Fig. 8b and d), while calculated  $\sigma_g$  was also 1.2 % smaller (Fig. 8c). In contrast, calculated  $D_{g0}$  slightly increased 0.3 % at the same height (Fig. 8a19a). Almost no effect of  $\text{NH}_4\text{NO}_3$  equilibrium-gas-particle conversion was found in Aitken mode (Fig. 8e-h10e-h).

Figure 9-11 shows the differences in the total number concentration among above, within, and below the canopy during the daytime in the late autumn period, with particular reference to the differences among these concentrations. In the sub-micron size range (0.1-0.4-0.4  $\mu\text{m}$ ), differences between height pairs were strong between 8 and 1 m (below), between 30 and 24 m (above), and between 24 and 8 m (within). In the "no gpc dry" scenario, the difference in number concentration between height pairs was minimal in the sub-micron size range as determined by modelled size-resolved dry deposition velocity (Fig. 9e-11e). This is a similar result to demonstrated by past numerical study for size-resolved particle number flux (Ryder, 2010); the certain particle diameter around 0.15  $\mu\text{m}$  at which the apparent flux switched from deposition to emission within the canopy and approximately reflected the peak in the number size distribution. Furthermore, the apparent emission flux was represented as more particles shrink into a given size bin from the next larger size than are leaving the bin to the next smaller size, while more particles shrink out of a given size bin than shrink into it from the next larger size bin, resulting in apparent fast deposition (Ryder, 2010). In the "gpc" scenario (Fig. 9ad), aerosols-11a-d), particles in fine mode shrunk in this size range due to in-canopy  $\text{NH}_4\text{NO}_3$  evaporation, resulting in an apparent tendency to emit from the canopy to the air above (Fig. 9d11d). Meanwhile, differences in number concentration between 24 and 8 m (within) for large aerosols-particles ( $> 0.3 \mu\text{m}$ ) were excessively high in the "gpc" scenario compared to observational data. In the "no gpc" scenario, in which only aerosol water uptake was considered (Fig. 9e11c), fine aerosol-particle size increased due to hygroscopic growth (Fig. 610), and the concentration differences between height pairs always remained positive in this range. Finally, if the "gpc" scenario, in which both processes of  $\text{NH}_4\text{NO}_3$  evaporation and hygroscopic growth are considered (Fig. 9b11b), calculated negative gradients of number concentration appeared between 24 and 8 m (within) for the sub-micron range 0.1-0.4  $\mu\text{m}$ , again similar to the observed patterns (Fig. 9a11a).

### 5.1 Uncertainties in observation and model results

SOLVEG reproduced the general features of gas concentration, fine aerosol-particle mass, and fine aerosol-particle number concentration observed within the canopy. Several uncertainties (e.g., low time resolution of weekly filter-pack data in the late autumn period; initialization of measurement uncertainty; complex topography of the study site) may cause underestimations in calculated wind speed (Fig. 3a and d4a) and overestimations in total number concentration within the canopy after 25 November 2016 (Fig. 6a9a). In the Fig. 8, the conditions for  $\text{NH}_4\text{NO}_3$  condensation were calculated in this forest, although these conditions are normally found over strong sources of  $\text{NH}_3$  (e.g. Nemitz et al., 2009). Thus, the results from this study can only be considered a first test of the model to the  $\text{NH}_4\text{NO}_3$  gas-particle conversion and aerosol water uptake of reactive nitrogen compounds, rather than a conclusive assessment of its capability.

Another uncertainty in the results could be associated with same composition assumption in size at the initial and boundary conditions. Variations of chemical composition in size caused variations in equilibrium vapor pressure at particle surface due to Kelvin and Raoult's effects, which caused uncertainty in the simulation of swelling and shrinking of particles. Since we used a modal aerosol dynamics method, differences of these effects within each mode cannot be resolved. We need to revisit this issue in the future by using size-resolved composition measurements and size-resolved aerosol model as done by Ryder (2010) to assess this uncertainty.

In the modeling aspect, aerosol-particle growth due to biogenic secondary organics was not considered and might increase uncertainty in model results. Although this effect might not be important for dry deposition and evaporation of  $\text{NH}_4\text{NO}_3$  that was the main focus of this study, this effect certainly influences the aerosol-particle mass flux itself in the forest. Nevertheless, the order of the magnitude of observed normalized inorganic mass concentration within the canopy during the daytime, i.e.,  $\text{SO}_4^{2-} > \text{NH}_3 > \text{NH}_4^+ > \text{NO}_3^- > \text{HNO}_3$  (Fig. 5a7a) was well reproduced by the model in the "gpc" scenario (Fig. 5e7c). In the late autumn period, while there is no direct measurement of aerosol water content, the ambient  $RH$  profile that determines hygroscopic growth of aerosols was reproduced (Fig. 3c and f4c). As a result, the observed in-canopy negative gradient in number concentration (i.e., apparent emission of aerosolsparticles) in  $0.1\text{--}0.4\text{--}0.4\text{ }\mu\text{m}$  size range was simulated in the "gpc" scenario (Fig. 9a-11a and b). These results indicate that the model results can likely be used to effectively address the impact of aerosol dynamics on dry deposition processes.

### 5.2 Formation mechanisms of aerosol-particle size distributions

The complex form of the aerosol-particle size distribution can be mainly explained by the combination of (1) effects of in-canopy  $\text{NH}_4\text{NO}_3$  evaporation of small aerosols-particles and (2) fine mode hygroscopic growth of large aerosolsparticles. Observed vertical gradients of size-resolved number concentration within the canopy were reproduced only in the "gpc" scenario (Fig. 9b11b), although other scenarios showed different tendencies as follows (Fig. 9ee11c-e). When only dry deposition processes were considered (Fig. 9e11e), number concentration above the canopy was always larger than that within the canopy. Although the sharp negative gradient of number concentration between height pairs was computed for the  $0.1\text{--}0.4\text{--}0.4\text{ }\mu\text{m}$

size range when the gas-particle conversion process was added to the model (Fig. 9d11d), positive gradients for large ~~aerosols~~ particles ( $> 0.2 \mu\text{m}$ ) took on excessively high values compared to observational data. The number concentration of such large ~~aerosols~~ particles increased within the canopy due to hygroscopic growth (Fig. 9d11d and e), resulting in the negative gradient from the air above the canopy to the air within the canopy.

### 5.3 Impacts of gas-particle conversion and aerosol dynamics on dry deposition

To quantify the impact of gas-particle conversion of  $\text{NH}_4\text{NO}_3$  on fine  $\text{NO}_3^-$  flux above the canopy, we plotted the respective ratios of  $\text{HNO}_3$ ,  $\text{NO}_3^-$  and  $\text{NH}_4^+$  fluxes over the canopy in the "gpc" scenario ( $F_{gpc}$ ) to those in the "no gpc" scenario ( $F_{nogpc}$ ), plotting each such ratio against  $RH$  at the top of the canopy in the early autumn period (Fig. 1012). In this study, since water uptake of aerosols, typically represented as the hygroscopic growth factor defined as the ratio between the humidified and dry particle diameters, is almost negligible under  $RH < \text{approximately } 80 \%$  and increases over  $RH > 80 \%$  (e.g., Fig. 6 in Katata et al., 2014), we defined the threshold of  $80 \%$  for high and low  $RH$  conditions. As depicted in Fig. 10b, ~~the gas-aerosol equilibrium~~ 12b, the gas-particle conversion of  $\text{HNO}_3$  and  $\text{NO}_3^-$  shifted toward the ~~aerosol-particle~~ phase under high  $RH$  conditions. Conversely, under low  $RH$  conditions ( $< 80 \%$ ), most  $F_{gpc}/F_{nogpc}$  ratio values were higher than unity for fine  $\text{NO}_3^-$  concentration (Fig. 10b12b and e). The impact of  $\text{NH}_4\text{NO}_3$  evaporation on fine  $\text{NO}_3^-$  flux was very strong just under the deliquescence relative humidity ( $DRH$ ) of pure  $\text{NH}_4\text{NO}_3$  of  $61.8 \%$ ; the  $F_{gpc}/F_{nogpc}$  ratio reached  $\sim 40$  around  $RH = 50 \%$  (Fig. 10b12b). Notably, the thermodynamic equilibrium model in SOLVEG calculates the mutual  $DRH$ , which should not be pure  $\text{NH}_4\text{NO}_3$  ~~aerosols~~ particles. Such high values of (apparent)  $\text{NO}_3^-$  flux have been observed in various forest types in Europe, as summarized in Nemitz (2015). These cases may be also affected by  $\text{NH}_4\text{NO}_3$  evaporation near the surface.

Calculated  $\text{HNO}_3$  flux decreased with decreasing  $RH$ , due to evaporation of  $\text{NH}_4\text{NO}_3$  (Fig. 10a12a). Most values of the  $F_{gpc}/F_{nogpc}$  ratio for  $\text{HNO}_3$  under dry conditions ( $RH < 80 \%$ ) were below  $0.5$ , and even tended to be negative, i.e., emission from the forest to the atmosphere. Prior studies have found this same flux difference; deposition velocity of  $\text{HNO}_3$  varies in a range from  $4$  to  $7 \text{ cm s}^{-1}$  (Huebert and Robert, 1985; Meyers et al., 1989; Sievering et al., 2001). These velocities have often been found to be lower than theoretical maximum values or even negative, i.e., emission from the canopy (Pryor et al. 2002; Nemitz et al., 2004a2004). High  $\text{HNO}_3$  concentrations were observed within the canopy with the appearance of upward  $\text{HNO}_3$  flux over the canopy (Pryor et al., 2002), indicating the possibility of flux divergence due to  $\text{NH}_4\text{NO}_3$  evaporation in the  $\text{HNO}_3$ - ~~$\text{NH}_3$~~ - $\text{NH}_4\text{NO}_3$  triad within the forest. This explanation has already been suggested by other studies (Harrison et al., 1989; Sutton et al., 1993; Kramm and Dlugi, 1994; Müller et al., 1993).

$\text{NH}_4^+$  flux over the forest was less influenced than  $\text{NO}_3^-$  by gas-to-particle conversion (Fig. 5e7c, f; Fig. 6d). ~~Because~~ 8d). It is because dry deposition rates of  $\text{NH}_3$  were much lower than those of  $\text{HNO}_3$ , ~~and so differences in deposition rates between  $\text{NH}_3$  evaporation had little opportunity to enhance deposition fluxes and  $\text{NH}_4^+$  are much smaller than those between  $\text{HNO}_3$  and  $\text{NO}_3^-$ .~~ In fact, the observed deposition trends for  $\text{NH}_3$  and  $\text{NH}_4^+$  were much weaker than those for  $\text{HNO}_3$  and  $\text{NO}_3^-$ . Also, while the major counter-ion of  $\text{NO}_3^-$  was  $\text{NH}_4^+$ , that of  $\text{NH}_4^+$  was not  $\text{NO}_3^-$  but  $\text{SO}_4^{2-}$ . Even though same count of molecules of  $\text{NH}_3$  and  $\text{HNO}_3$  evaporated, the gross deposition rate of  $\text{NH}_4^+$  appears to have been influenced mainly by  $(\text{NH}_4)_2\text{SO}_4$  and/or

$\text{NH}_4\text{HSO}_4$  as also suggested by Nemitz (2015). The effect of  $\text{NH}_4\text{NO}_3$  ~~equilibrium-gas-particle conversion~~ on  $\text{NH}_3$  flux was even lower than on fine  $\text{NH}_4^+$  (Fig. 4a6a) because the mass concentration of  $\text{NH}_3$  was much higher.

#### 5.4 Influencing the chemical transport modeling

Once the gpc process is considered, particle deposition could have very important contribution as nitrogen flux over the forest ecosystem. Comparing the calculated daytime mass flux at 30 m height between "no gpc" and "gpc" scenarios in the early autumn period (Fig. S2), deposition flux of fine  $\text{NO}_3^-$  and  $\text{NH}_4^+$  was 15 and 4 times higher in "gpc" scenario, respectively. Since there was almost no change in  $\text{SO}_4^{2-}$  flux between two scenarios, this change is only caused by gpc. For gas species, both  $\text{HNO}_3$  and  $\text{NH}_3$  slightly decreased to 0.6 and 0.8 times due to evaporation of  $\text{NH}_4\text{NO}_3$  particles. This change in flux could be applied to that in deposition velocity of each species. Furthermore, although particle deposition flux contributes to only 5 % of total nitrogen flux above the canopy in "no gpc" scenario, this impact was increased to 38 % ( $\text{NO}_3^-$ : 27 %,  $\text{NH}_4^+$ : 11 %) in "gpc" scenario. It should be noted that the contribution of  $\text{NH}_3$  was still large as 37 % in total nitrogen flux even in the "gpc" scenario. The above results indicate that the increase of (apparent) particle deposition due to  $\text{NH}_4\text{NO}_3$  evaporation may be important in the chemical transport modeling.

Theoretical values of deposition velocity for sub-micron aerosols-particles typically ranging from  $0.1\text{--}1\text{ cm s}^{-1}$  may have no substantial impact on surface concentrations in chemical transport models. However, as discussed in the previous subsection, high deposition velocity of fine  $\text{NO}_3^-$  due to evaporation in the forest (up to 40 times the above values) may effectively remove nitrate aerosols-particles from the atmosphere over the forest and leeward. If the aerosol dynamics and gas-particle conversion processes can be incorporated into the dry deposition scheme in chemical transport models, we could improve upon or even eliminate prior studies' overestimates of the surface concentration of fine  $\text{NO}_3^-$  (Kajino et al., 2013; Shimadera et al., 2014, 2018; Morino et al., 2015; Sakurai et al., 2015). Hicks et al. (2016) found that in modeling deposition velocities of aerosols-particles, the greatest uncertainty manifests in the range  $0.1\text{--}1.0\text{ }\mu\text{m}$ . The cause of this uncertainty is still not convincingly established, although the differing treatments of some key aerosol-particle deposition processes (e.g., turbulent diffusion) have been suggested by prior studies (Petroff and Zhang, 2010; Zhang and Shao, 2014). As demonstrated in Fig. 4b-12b and c, evaporation of  $\text{NH}_4\text{NO}_3$  under less humid conditions may play an important role for dry deposition of sub-micron aerosols-particles.

## 6 Conclusions

A new multi-layer land surface model fully coupled with dry deposition and aerosol dynamics was developed to evaluate the impact of  $\text{NH}_4\text{NO}_3$ - $\text{NH}_3$ - $\text{HNO}_3$  conversion in temperate forests. The model was applied to field studies of mass and number concentration profiles in a Japanese mixed forest during autumn 2016. Four model scenarios with/without  $\text{NH}_4\text{NO}_3$  ~~equilibrium~~ gas-particle conversion and/or aerosol water uptake were tested to quantify the impact of the above processes on dry deposition processes. While the The model overall successfully reproduced micrometeorological conditions (in particular, relative humidity) within and above the canopy, ~~measured profiles of~~, In the simulation including  $\text{NH}_4\text{NO}_3$  gas-particle conversion

processes, vertical gradients of normalized mass concentrations of nitrogen gases ( $\text{HNO}_3$  and  $\text{NH}_3$ ) and fine aerosols-particles ( $\text{NO}_3^-$  and  $\text{NH}_4^+$ ) within the canopy were ~~reproduced only in the model including  $\text{NH}_4\text{NO}_3$  equilibrium processes. For aerosol~~  
435 clearly high than that for  $\text{SO}_4^{2-}$ . For particle size distribution, the observed emission tendency of total number concentration from the canopy to the atmosphere was explained by a larger effect of within-canopy evaporation of  $\text{NH}_4\text{NO}_3$  than hygroscopic growth. As a result, the removal flux of calculated fine  $\text{NO}_3^-$  from the air above the forest to the forest can increase by up to 40 times under the  $DRH$  of pure  $\text{NH}_4\text{NO}_3$ . Similarly, the removal flux of calculated fine  $\text{NH}_4^+$  can increase up to  $\sim 10$  times, though calculations for fine  $\text{NH}_4^+$  fluctuate strongly with  $RH$ . Conversely,  $\text{HNO}_3$  flux over the forest can decrease by 50 %  
440 or more due to  $\text{NH}_4\text{NO}_3$  evaporation, as supported by prior studies. The processes of aerosol dynamics and  $\text{NH}_4\text{NO}_3$ - $\text{NH}_3$ - $\text{HNO}_3$  conversion play a crucial role in the dry deposition of inorganic nitrogen aerosols-particles in temperate forests. These processes can and should be incorporated into chemical transport models to improve the accuracy of total nitrate surface concentrations. An aerosol dynamics - dry deposition scheme simplified from that of this study can be implemented in chemical transport models ~~with high feasibility~~.

445 *Data availability.* The output data in this study are publicly accessible via contacting the first author.

*Author contributions.* GK developed the model with support from MK, and performed the simulations using the data collected by KM, AS, and KT. GK prepared the manuscript with contributions from all co-authors.

*Competing interests.* We have no conflict of interest to declare.

*Acknowledgements.* We gratefully acknowledge the helpful comments and suggestions from Dr. Kentaro Hayashi at the National Institute  
450 for Agro-Environmental Sciences, Dr. Tatsuya Sakurai at Meisei University, Dr. Takeshi Izuta at Tokyo University of Agriculture and Technology, Dr. Satoru Miura at the Forestry and Forest Products Research Institute, and Drs. Makoto Tamura and Tetsuji Ito at Ibaraki University, Japan. Our thanks are also extended to Mr. Mao Xu at the Tokyo University of Agriculture and Technology, Japan, for his contribution to the filter-pack measurements. This work was partly supported by a Grant-in-Aid for Scientific Research (16H02933 and 17H01868) and Leading Initiative for Excellent Young Researchers, provided by the Japan Society for the Promotion of Science and the Ministry of Education,  
455 Culture, Sports, Science and Technology.



## References

- Bae, S.Y., Jung, C.H., and Kim, Y.P.: Development of an aerosol dynamics model for dry deposition process using the moment method, *Aerosol. Sci. Technol.*, 43, 6, 570-580, 2009.
- Binkowski F. S., and Shankar, U.: The regional particulate model 1. Model description and preliminary results, *J. Geophys. Res.*, 100, D12, 26191-26209, 1995.
- 460 Brost, R.A., Delany, A.C., and Huebert, B.J.: Numerical modeling of concentrations and fluxes of  $\text{HNO}_3$ ,  $\text{NH}_3$ , and  $\text{NH}_4\text{NO}_3$  near the surface, *J. Geophys. Res.*, 93, 7137-7152, 1998.
- Burba, G., Schmidt, A., Scott, R.L., Nakai, T., Kathilankal, J., Fratini, G., Hanson, C., Law, B., McDermitt, D.K., Eckles, R., Furtaw, M., and Velgersdyk, M.: Calculating  $\text{CO}_2$  and  $\text{H}_2\text{O}$  eddy covariance fluxes from an enclosed gas analyzer using an instantaneous mixing ratio, *Glob. Change Biol.*, 18, 385-399, 2012.
- 465 Deventer, M.J., Held, A., El-Madany, T.S., Klemm, O.: Size-resolved eddy covariance fluxes of nuclear to accumulation mode aerosol particles over a coniferous forest, *Agric. For. Meteorol.*, 214-215, 328-340, 2015.
- Duarte, H. F., Dias, N.L. and Maggioletto, S.R.: Assessing daytime downward longwave radiation estimates for clear and cloudy skies in southern Brazil, *Agric. For. Meteorol.*, 139, ~~171-181~~[171-181](#), 2006.
- 470 EANET (Acid Deposition Monitoring Network in East Asia): The Third Periodic Report on the State of Acid Deposition in East Asia Part III: Executive Summary, 2-5, [https://www.eanet.asia/wp-content/uploads/2019/03/3\\_ex.pdf](https://www.eanet.asia/wp-content/uploads/2019/03/3_ex.pdf), 2016.
- Farquhar, G.D., Firth, P.M., Wetselaar, R. and Weir, B.: On the gaseous exchange of ammonia between leaves and the environment: determination of the ammonia compensation point, *Plant Physiol.*, 66, 710-714, 1980.
- [Flechard, C., Fowler, D., Sutton, M.A. and Cape, J.N.: A dynamic chemical model of bi-directional ammonia exchange between semi-natural vegetation and the atmosphere, \*Q. J. Roy. Meteorol. Soc.\*, 125, 2611-2641.](#)
- 475 Fowler, D., Pilegaard, K., Sutton, M.A., Ambus, P., Raivonen, M., Duyzer, J., Simpson, D., Fagerli, H., Fuzzi, S., Schjoerring, K.J., Granier, C., Nefter, A., Isaksen, I. S.A., Laj, P., Maione, M., and Monks, P.S.: Atmospheric composition change: Ecosystems-atmosphere interactions, *Atmos. Environ.*, 43, 5193-5267, 2009.
- Fountoukis, C., and Nenes, A.: ISORROPIA II: A computationally efficient thermodynamic equilibrium model for  $\text{K}^+$ - $\text{Ca}^{2+}$ - $\text{Mg}^{2+}$ - $\text{NH}_4^+$ - $\text{Na}^+$ - $\text{SO}_4^{2-}$ - $\text{NO}_3^-$ - $\text{Cl}^-$ - $\text{H}_2\text{O}$  aerosols, *Atmos. Chem. Phys.*, 7, ~~4639-4659~~[4639-4659](#), 2007.
- [Fuchs, N.A.: The Mechanics of Aerosols, Pergamon Press, Oxford, 408, 1964.](#)
- Harrison, R.M., Rapsomanikis, S. and Turnbull, A.: Land Surface Exchange in a Chemically-Reactive System - Surface Fluxes of  $\text{HNO}_3$ ,  $\text{HCl}$  and  $\text{NH}_3$ , *Atmos. Environ.*, 23, 1795-1800, 1989.
- Harrison, R.M., Sturges, W.T., Kitto, A.M.N. and Li, Y.: Kinetics of the evaporation of ammonium chloride and ammonium nitrate aerosols, *Atmos. Environ.*, 24A, 1883-1888, 1990.
- 485 Hicks, B. B., Saylor, R.D. and Baker, B.D.: Dry deposition of particles to canopies A look back and the road forward, *J. Geophys. Res. Atmos.*, 121, 14, 691-14, 707, doi:10.1002/2015JD024742., 2016.
- Honjo, T., Takahashi, A. and Matsuda, K.: Deposition velocity of sulfate and nitrate in  $\text{PM}_{2.5}$  above a forest in suburban Tokyo using relaxed eddy accumulation, *J. Jpn. Soc. Atmos. Environ.*, 51, 257-265, 2016 (in Japanese with English abstract).
- 490 Huebert, B.J., Luke, W.T., Delany, A.C. and Brost, R.A.: Measurements of concentrations and dry surface fluxes of atmospheric nitrates in the presence of ammonia, *J. Geophys. Res.*, 93, 7127-7136, 1988.

- Horst, T.W. and Lenschow, D.H.: Attenuation of scalar fluxes measured with spatially-displaced sensors, *Bound.-Layer Meteorol.*, 130, 275-300, 2009.
- 495 Ibrom, A., Dellwik, E., Flyvbjerg, H., Jensen, N.O. and Pilegaard, K.: Strong low-pass filtering effects on water vapor flux measurements with closed-path eddy correlation systems, *Agric. For. Meteorol.*, 147, 140-156, 2007.
- Järvinen, A., Aitoma, M., Rostedt, A., Keskinen, J., Yli-Ojanperä, J.: Calibration of the new electrical low pressure impactor (ELPI+), *J. Aerosol Sci.*, 69, 150-159, 2014.
- Kaimal, J.C. and Finnigan, J.J.: *Atmospheric boundary layer flows: their structure and measurement*, Oxford university press, 289, 1994.
- 500 Kajino, M., Inomata, Y., Sato, K., Ueda, H., Han, Z., An, J., Katata, G., Deushi, M., Maki, T., Oshima, N., Kurokawa, J., Ohara, T., Takami, A. and Hatakeyama, S.: Development of an aerosol chemical transport model RAQM2 and predications of Northeast Asian aerosol mass, size, chemistry, and mixing type, *Atmos. Chem. Phys.*, 12, 11833-11856, 2012.
- Kajino, M., Sato, K., Inomata, Y. and Ueda, H.: ~~Source-receptor~~ [Source-receptor](#) relationships of nitrate in Northeast Asia and influence of sea salt on the long-range transport of nitrate, *Atmos. Environ.*, 9, 67-78, 2013.
- Katata, G.: Improvement of a land surface model for accurate prediction of surface energy and water balances, *JAEA-Data/Code*, 2008-033, 505 64, 2009.
- [Katata, G., Nagai, H., Wrzesinsky, T., Klemm, O., Eugster, W., and Burkard, R.: Development of a land surface model including cloud water deposition on vegetation, \*J. Appl. Meteorol. Climatol.\*, 47, 2129-2146, 2008.](#)
- Katata, G., Hayashi, K., Ono, K., Nagai, H., Miyata, A. and Mano, M.: Coupling atmospheric ammonia exchange process over a rice paddy field with a multi-layer atmosphere-soil-vegetation model, *Agric. For. Meteorol.*, 180, 1-21, 2013.
- 510 Katata, G., Kajino, M., Matsuda, K., Takahashi, A. and Nakaya, K.: A numerical study of the effects of aerosol hygroscopic properties to dry deposition on a broad-leaved forest, *Atmos. Environ.*, 97, 501-510, 2014.
- Katata, G. and Ota, M.: A terrestrial ecosystem model (SOLVEG) coupled with atmospheric gas and aerosol exchange processes, *JAEA-Data/Code*, 2016-014, 35, 2017.
- 515 Katata, G., [Grote, R.](#), Mauder, M., Zeeman, M., ~~Grote, R.~~ and Ota, M.: Wintertime ~~carbon uptake of managed temperate grassland ecosystems may influence grassland dynamics~~ [grassland dynamics may influence below-ground biomass under climate change: a model analysis](#), *Biogeosci. Discuss.*, in press.
- [Kirsch, A. A. and Fuchs, N. A.: Studies on fibrous aerosol filters. III. Diffusional deposition of aerosols in fibrous filters, \*Ann. Occup. Hyg.\*, 11, ~~submitted~~ 299-304, 1968.](#)
- Kramm, G. and Dlugi, R.: Modelling of the vertical fluxes of nitric acid, ammonia and ammonium nitrate, *J. Atmos. Chem.*, 319-357, 1994.
- 520 [Li, K., Liu, X., Song, W., Chang, Y., Hu, Y., Tian, C.: Atmospheric nitrogen deposition at two sites in an arid environment of central Asia. \*PLoS ONE\*, 8, e67018, 2013.](#)
- Massad, R.-S., Nemitz, E. and Sutton, M.A.: Review and parameterisation of bi-directional ammonia exchange between vegetation and the atmosphere, *Atmos. Chem. Phys.*, 10, 10359-10386, 2010.
- 525 Matsuda, K., Watanabe, I., Mizukami, K., Ban, S. and Takahashi, A.: Dry deposition of PM<sub>2.5</sub> sulfate above a hilly forest using relaxed eddy accumulation, *Atmos. Environ.*, 107, 255-261, 2015.
- Mauder, M. and Foken, T.: Impact of post-field data processing on eddy covariance flux estimates and energy balance closure, *Meteorologische Zeitschrift*, 15, 597-609, 2006.

- Moncrieff, J.B., Clement, R., Finnigan, J. and Meyers, T.: Averaging, detrending and filtering of eddy covariance time series, in Handbook of micrometeorology: a guide for surface flux measurements, eds. Lee, X., Massman, W.J., Law, B.E.. Kluwer Academic, Dordrecht, 7-31, 530 2004.
- Morino, Y., Nagashima, T., Sugata, S., Sato, K., Tanabe, K., Noguchi, T., Takami, A., Tanimoto, H. and Ohara, T.: Verification of chemical transport models for PM<sub>2.5</sub> chemical composition using simultaneous measurement data over Japan, Aerosol Air Qual. Res., 15, ~~2009~~~~2023~~~~2009-2023~~, 2015.
- Müller, H., Kramm, F. Meixner, Dollard, G.J., Fowler, D. and Possanzini, M.: Determination of HNO<sub>3</sub> dry deposition by modified Bowen ratio and aerodynamic profile techniques, Tellus B, 45, 346-367, 1993. 535
- Nagai, H.: Atmosphere-soil-vegetation model including CO<sub>2</sub> exchange processes: SOLVEG2, JAERI-Data/Code, 2004-014, 92, 2004.
- Nakahara, S., Takagi, K., Sorimachi, A., Katata, G. and Matsuda, K.: Enhancement of dry deposition of PM<sub>2.5</sub> nitrate in a cool-temperate forest, Atmos. Environ., 212, 136-141, 2019.
- [Nemitz, E., Sutton, M.A., Gut, A., José, R.S., Husted, S. and Schjoerring, J.K.: Sources and sinks of ammonia within an oilseed rape canopy, Agr. Forest Meteorol., 105, 385-404, 2000.](#) 540
- Nemitz, E. and Sutton, M.A.: Gas-particle interactions above a Dutch heathland: III. Modelling the influence of the NH<sub>3</sub>-HNO<sub>3</sub>-NH<sub>4</sub>NO<sub>3</sub> equilibrium on size-segregated particle fluxes, Atmos. Chem. Phys., 4, 1025-1045, 2004.
- Nemitz, E., Sutton, M.A., [Schjoerring, J.K., Husted, S. and Wyers, G.P.: Resistance modelling of ammonia exchange over oilseed rape, Agr. Forest Meteorol., 105, 405-425, ~~Otjes, R. P., Mennen, M.G., van Putten, E.M. and Gallagher, M.W. 2000.~~](#)
- [Nemitz, E., Sutton, M.A., Wyers, G.P. and Jongejan, P.A.C.: Gas-particle interactions above a Dutch heathland: ~~H. Concentrations and surface~~ ~~I. Surface~~ exchange fluxes of ~~atmospheric particles~~-NH<sub>3</sub>, SO<sub>2</sub>, HNO<sub>3</sub> and HCl, Atmos. Chem. Phys., ~~4~~, ~~1007-1024~~~~989-1005~~, 2004.](#) 545
- [Nemitz, E., Dorsey, J. R., Flynn, M. J., Gallagher, M. W., Hensen, A., Erismann, J.-W., Owen, S. M., Dämmgen, U., and Sutton, M. A.: Aerosol fluxes and particle growth above managed grassland, Biogeosci., 6, 1627-1645, 2009.](#)
- Nemitz, E.: Surface/atmosphere Exchange of Atmospheric Acids and Aerosols, Including the Effect and Model Treatment of Chemical Interactions. Review and Integration of Biosphere-Atmosphere Modelling of Reactive Trace Gases and Volatile Aerosols, Springer, ~~115~~~~149~~~~115-149~~, 2015. 550
- Neirynck, J., and Ceulemans, R.: Bidirectional ammonia exchange above a mixed coniferous forest, Environ. Pollut., 154, 424-438, 2008.
- Ota, M., Nagai, H. and Koarashi, J.: Root and dissolved organic carbon controls on subsurface soil carbon dynamics: A model approach, J. Geophys. Res., 118, 1646-1659, 2013.
- [Pan, Y., Wang, Y., Tang, G., and Wu, D.: Wet and dry deposition of atmospheric nitrogen at ten sites in Northern China, Atmos. Chem. Phys., 12, 6515-6535, 2012.](#) 555
- [Peters, K. and Eiden, R.: Modelling the dry deposition velocity of aerosol particles to a spruce forest, Atmos. Environ., 26A, 2555-2564, 1992.](#)
- Petroff, A. ~~and~~, [Zhang, L., Pryor, S.C. and Belot, Y.: An extended dry deposition model for aerosols onto broadleaf canopies, J. Aerosol Sci. 40, 218-240, 2009.](#) 560
- [Petroff, A. and Zhang, L.: Development and validation of a size-resolved particle dry deposition scheme for application in aerosol transport models, Geosci. Model Dev., 3, 753-769, 2010.](#)
- Pryor, S.C., Barthelmie, R.J., Jensen, B., Jensen, N.O. and Sørensen, L.L.: HNO<sub>3</sub> fluxes to a deciduous forest derived using gradient and REA methods, Atmos. Environ., 36, 5993-5999, 2002.

- 565 [Ryder, J., 2010. Emission, deposition and chemical conversion of atmospheric trace substances in and above vegetation canopies. PhD Thesis, University of Manchester, UK. Available from the University or via <https://nora.nerc.ac.uk>](#)
- Sakamoto, T., Nakahara, A., Takahashi, A., Sorimachi, A., Katata, G. and Matsuda, K.: Deposition velocity of PM<sub>2.5</sub> nitrate and gaseous nitric acid above a forest in suburban Tokyo using relaxed eddy accumulation with denuder sampling technique, *J. Jpn. Soc. Atmos. Environ.*, 53, 136-143, 2018 (in Japanese with English abstract).
- 570 Sakurai, T., Satake, S. and Matsuda, K.: Measurement of the inorganic ions in PM<sub>2.5</sub> at western Tokyo and the evaluation for AQM performance based on the measurement, *Eurozoru Kenkyu*, 30, 134-141, 2015 (In Japanese with English abstract).
- [Seinfeld, J.H. and Pandis, S.N.: Atmospheric Chemistry and Physics: From Air Pollution to Climate Change. 2nd eds., John Wiley & Sons, New York, 2006.](#)
- Shimadera, H., Hayami, H., Chatani, S., Morino, Y., Mori, Y., Morikawa, T., Yamaji, K. and Ohara, T.: Sensitivity analyses of factors influencing CMAQ performance for fine particulate nitrate, *J. Air Waste Manage. Assoc.*, 64, 374-387, 2014.
- 575 Shimadera, H., Hayami, H., Chatani, S., Morikawa, T., Morino, Y., Mori, Y., Tamaji, K., Nakatsuka, S. and Ohara, T.: Urban air quality model inter-comparison study (UMICS) for improvement of PM<sub>2.5</sub> simulation in greater Tokyo area of Japan, *Asian J. Atmos. Environ.*, 12, 139-152, 2018.
- Sievering, H., Enders, G., Kins, L., Kramm, G., Ruoss, K., Roider, G., Zelger, M., Anderson, I. and Dlugi, R.: Nitric acid, particulate nitrate and ammonium profiles at the Bayerischer Wald: evident for large deposition rates of total nitrate, *Atmos. Environ.*, 28, 311-315, 1994.
- 580 [Sutton, M.A., Asman, W.A.H. and Schjorring, J.K.: Dry deposition of reduced nitrogen, \*Tellus B\* 46, 255-273, 1994](#)
- Sutton, M.A., Pitcairn, C.E.R. and Fowler, D.: The exchange of ammonia between the atmosphere and plant communities, *Adv. Ecol. Res.*, 24, 301-393, 1993.
- [Sutton, M.A., Burkhardt, J.K., Guerin, D., Nemitz, E., and Fowler, D.: Development of resistance models to describe measurement of bi-directional ammonia surface atmosphere exchange, \*Atmos. Environ.\*, 32, 473-480, 1998.](#)
- 585 [Takahashi, A. and Wakamatsu, T.: Estimation of deposition velocity of particles to a forest using the concentration gradient method, \*J. Jpn. Soc. Atmos. Environ.\*, 39, 53-61, 2004 \(In Japanese with English abstract\).](#)
- van Hove, L.W.A., Adema, E.H. and Vredenberg, W.J.: A study of the adsorption of NH<sub>3</sub> and SO<sub>2</sub> on leaf surfaces, *Atmos. Environ.*, 23, 1479-1486, 1989.
- 590 van Oss, R., Duyzer, J., and Wyers, P.: The influence of gas-to-particle conversion on measurements of ammonia exchange over forest, *Atmos. Environ.*, 32, 465-471, 1998.
- Vickers, D. and Mahrt, L.: Quality control and flux sampling problems for tower and aircraft data, *J. Atmospheric Ocean. Technol.*, 14, 512-526, 1997.
- Wolff, V., Meixner, F.X. and Trebs, I.: Mixing ratios and exchange processes of the ammonia-nitric acid-ammonium nitrate triad above a spruce forest canopy. In: H. LacosteFrancid (Ed.), *Earth Observations for Land-Atmosphere Interaction Science*. European SpaceAgency, ESTEC PO Box 299 2200, 2011.
- 595 [Xu, W., Luo, X. S., Pan, Y. P., Zhang, L., Tang, A. H., Shen, J. L., Zhang, Y., Li, K. H., Wu, Q. H., Yang, D. W., Zhang, Y. Y., Xue, J., Li, W. Q., Li, Q. Q., Tang, L., Lv, S. H., Liang, T., Tong, Y. A., Liu, P., Zhang, Q., Xiong, Z. Q., Shi, X. J., Wu, L. H., Shi, W. Q., Tian, K., Zhong, X. H., Shi, K., Tang, Q. Y., Zhang, L. J., Huang, J. L., He, C. E., Kuang, F. H., Zhu, B., Liu, H., Jin, X., Xin, Y. J., SHi, X. K., Du, E. Z., Dore, A. J., Tang, S., Collett, J. L., Jr, Goulding, K., Sun, Y. X., Ren, J., Zhang, F. S., and Liu, X. J.: Quantifying atmospheric nitrogen deposition through a nationwide monitoring network across China, \*Atmos. Chem. Phys.\*, 15, 12345-12360, 2015.](#)
- 600

- Yamazaki, T., Takahashi, A. and Matsuda, K.: Differences of dry deposition between sulfate and nitrate in PM<sub>2.5</sub> to a forest in suburban Tokyo by vertical profile observations, *J. Jpn. Soc. Atmos. Environ.*, 50, 167-175, 2015 (In Japanese with English abstract).
- Zhang, Q., Jimenez, J.L., Canagaratna, M.R., D. Allan, J.D., Coe, H., Ulbrich, I., Alfarra, M., Takami, A., Middlebrook, A.M., Sun, Y.L.,  
605 Dzepina, K., Dunlea, E., Docherty, K., DeCarlo, P., Salcedo, D., Onasch, T., Jayne, J.T., Miyoshi, T., Shimojo, A. and Worsnop, D.: Ubiquity and dominance of oxygenated species in organic aerosols in anthropogenically influenced Northern Hemisphere midlatitudes, *Geophys. Res. Lett.*, 34, L13801, doi:10.1029/2007GL029979, 2007.
- Zhang, J. and Shao, Y.: A new parameterization of particle dry deposition over rough surfaces, *Atmos. Chem. Phys.*, 14, 12429-12440, 2014.

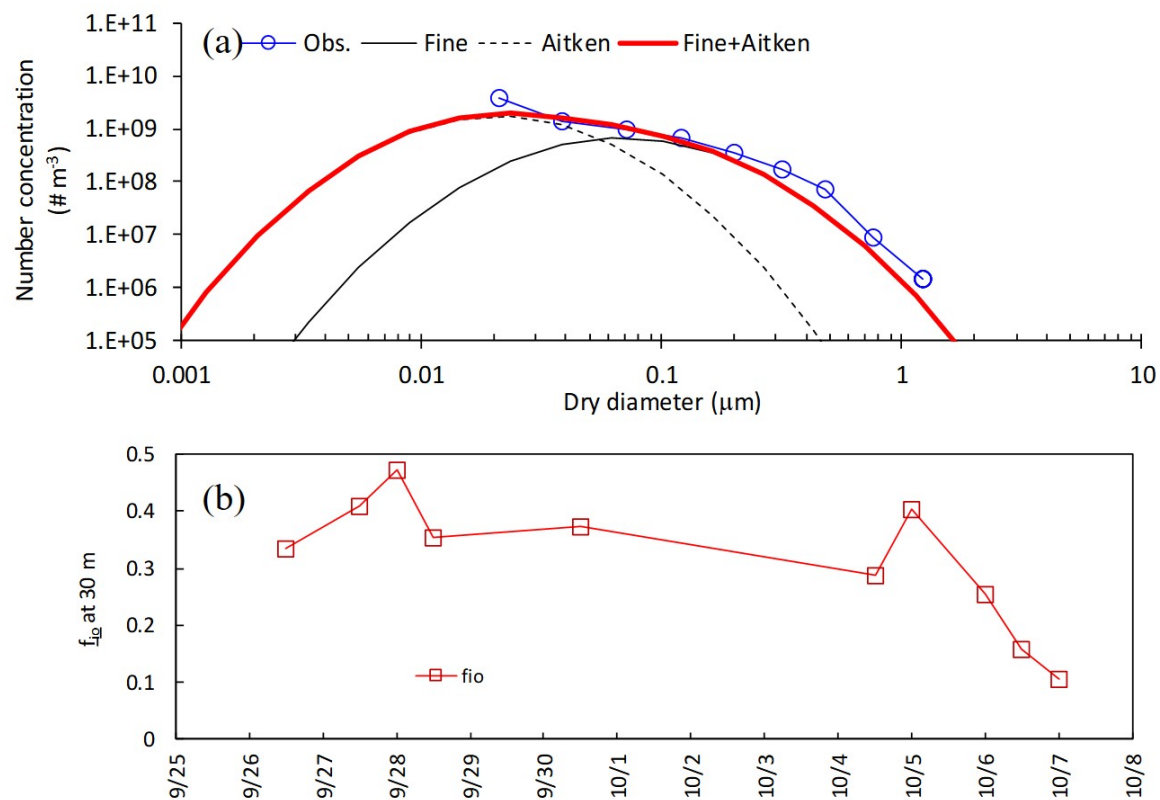

**Figure 1.** (a) Modeled and observed number-based size distribution of ~~aerosols~~-particles at 10:00 on 7 November 2016, and (b) temporal changes in the volume fraction of inorganic compounds ( $f_{io}$ ) in the early autumn period.

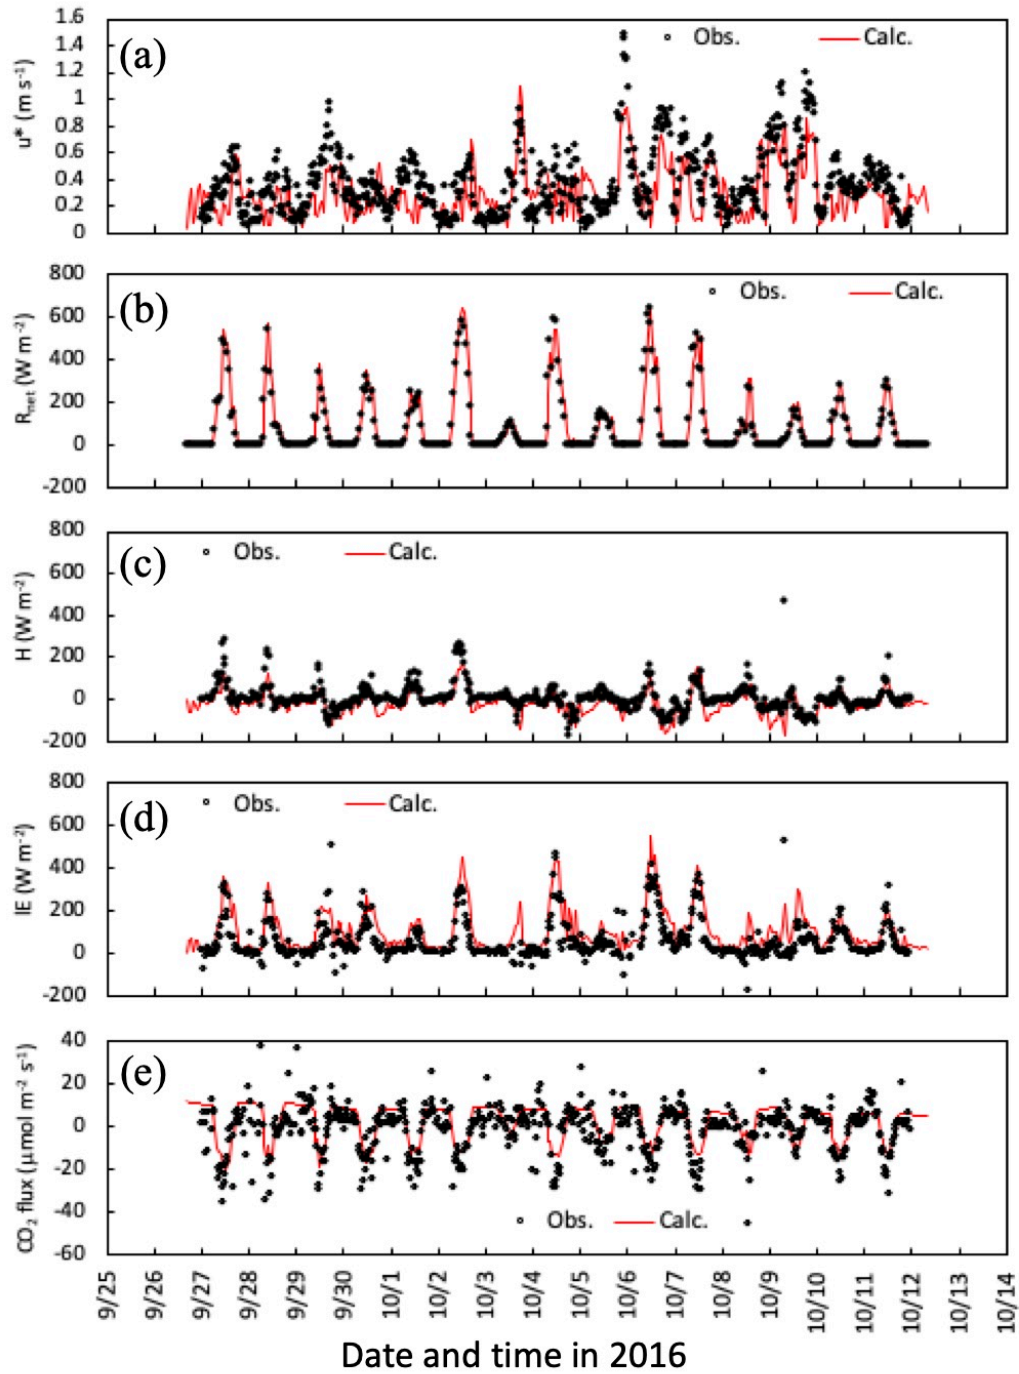

**Figure 2.** Temporal changes in observed and simulated (a-f) friction velocity, (b-g) net radiation, (c-h) sensible and (d-i) latent heat, and (e-j)  $\text{CO}_2$  fluxes (ae) from 27 September to 11 October 2016.



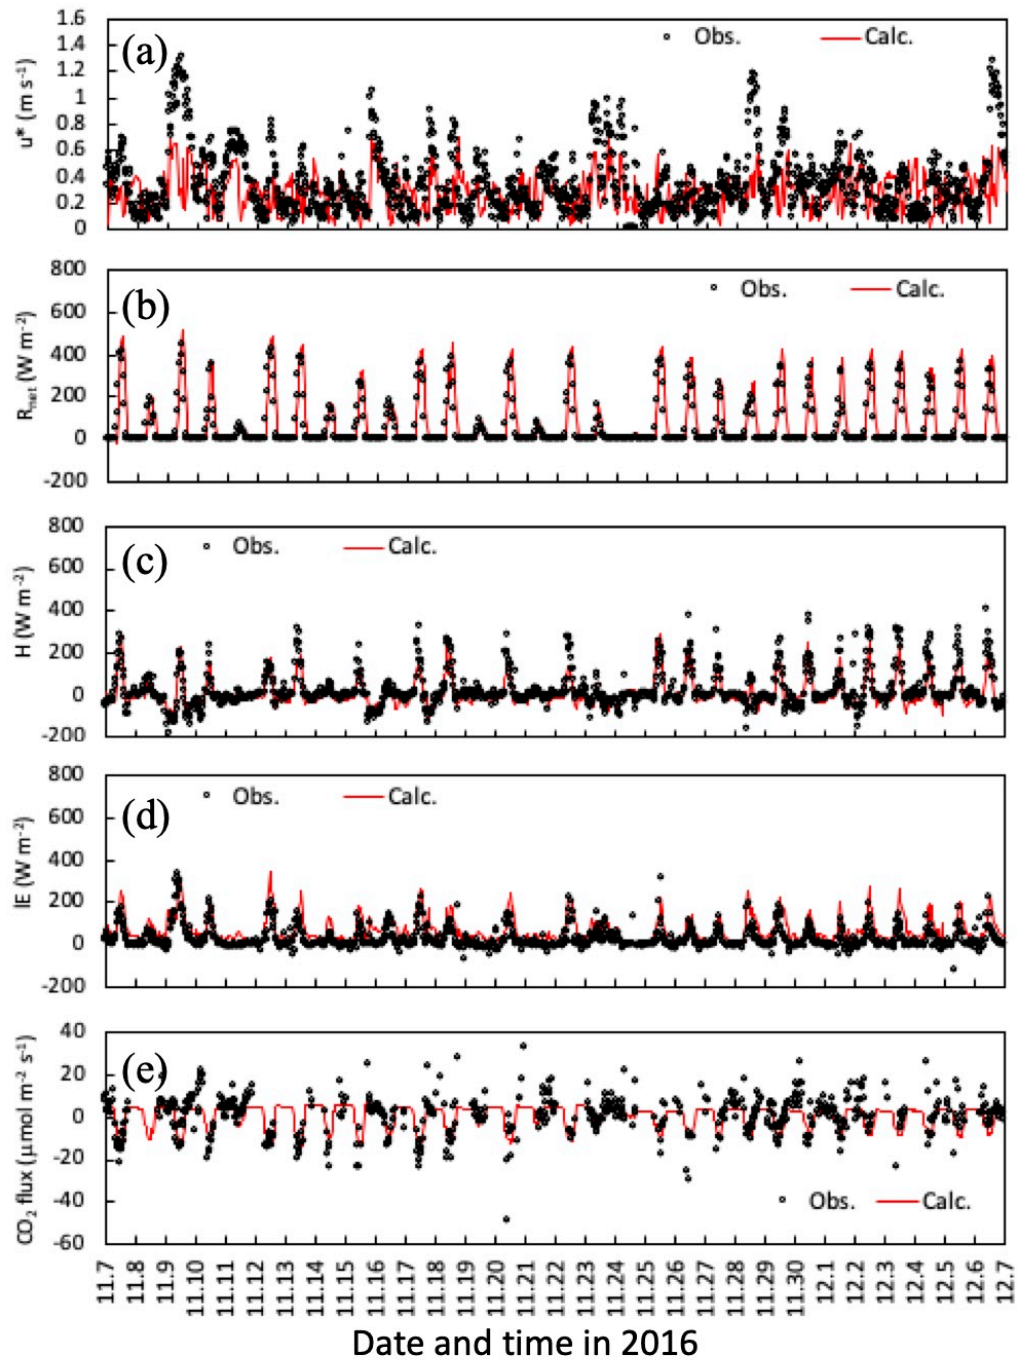

**Figure 3.** Temporal changes in observed and simulated (a) friction velocity, (b) net radiation, (c) sensible and (d) latent heat, and (e)  $\text{CO}_2$  fluxes from 7 November to 6 December 2016.

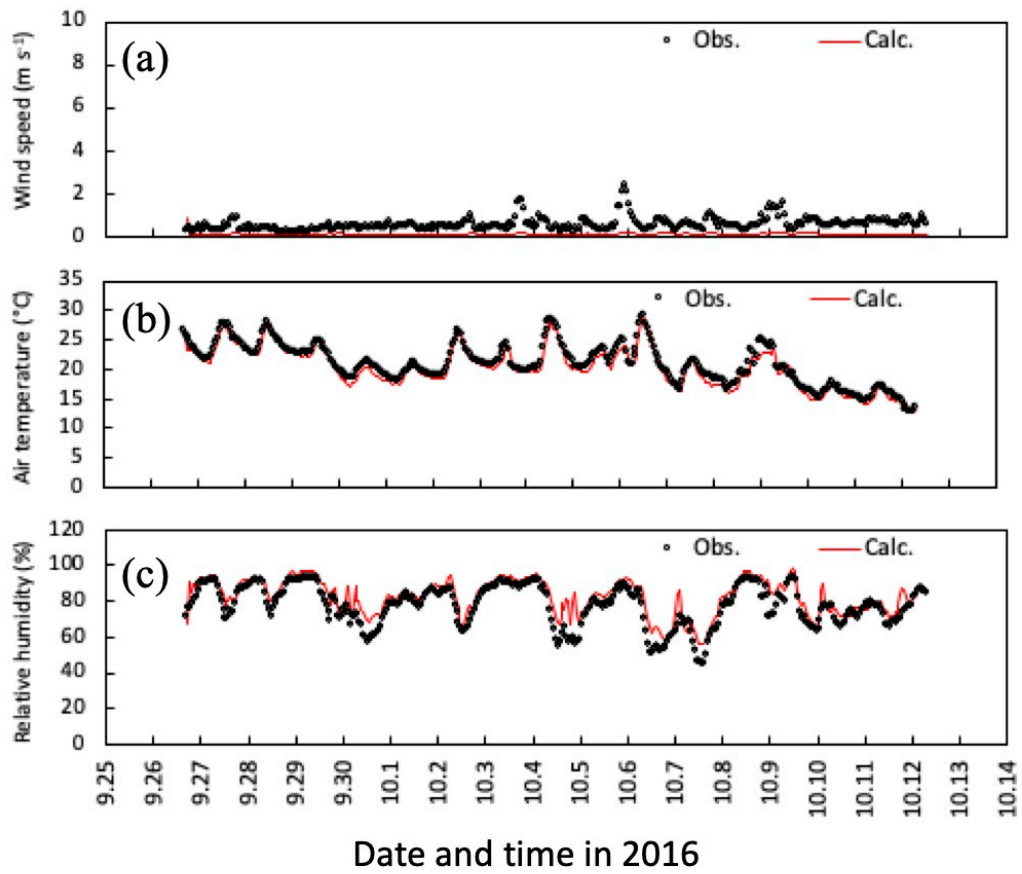

**Figure 4.** Temporal changes in observed and simulated (a-d) horizontal wind speed, (b-e) air temperature, and (c-f) relative humidity at 6 m height (ae) from 27 September to 11 October 2016.

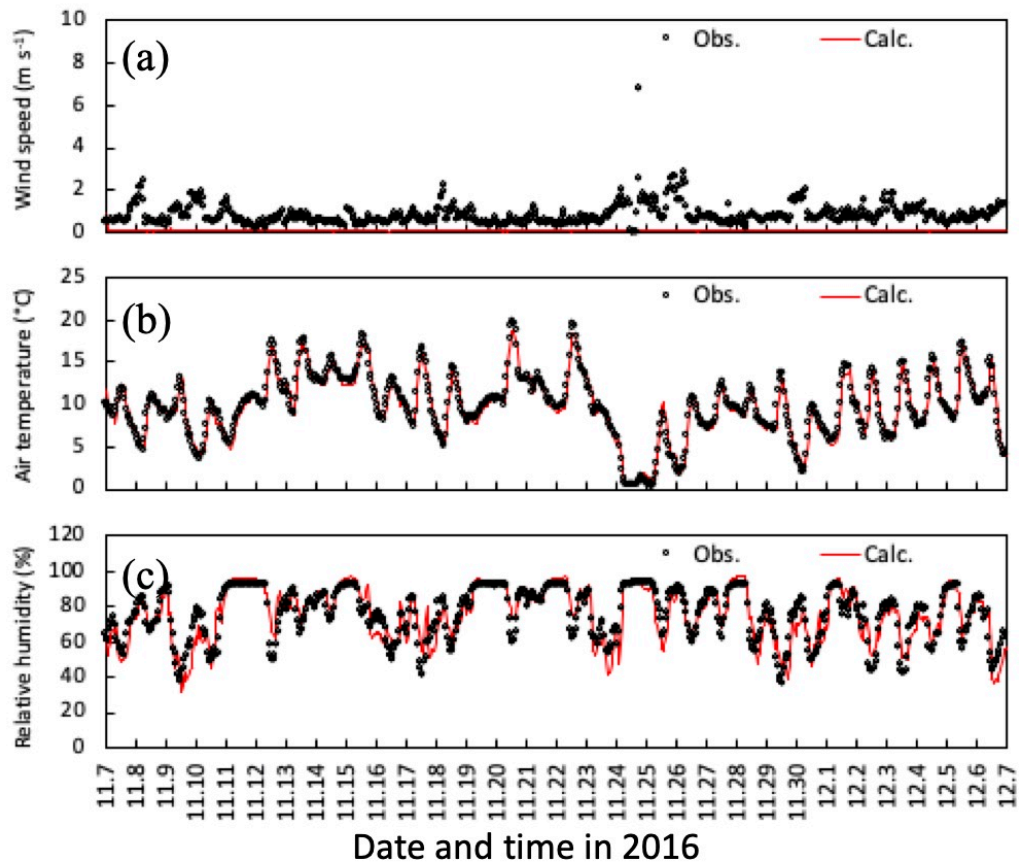

**Figure 5.** Temporal changes in observed and simulated (a) horizontal wind speed, (b) air temperature, and (c) relative humidity at 6 m height from 7 November to 6 December 2016.

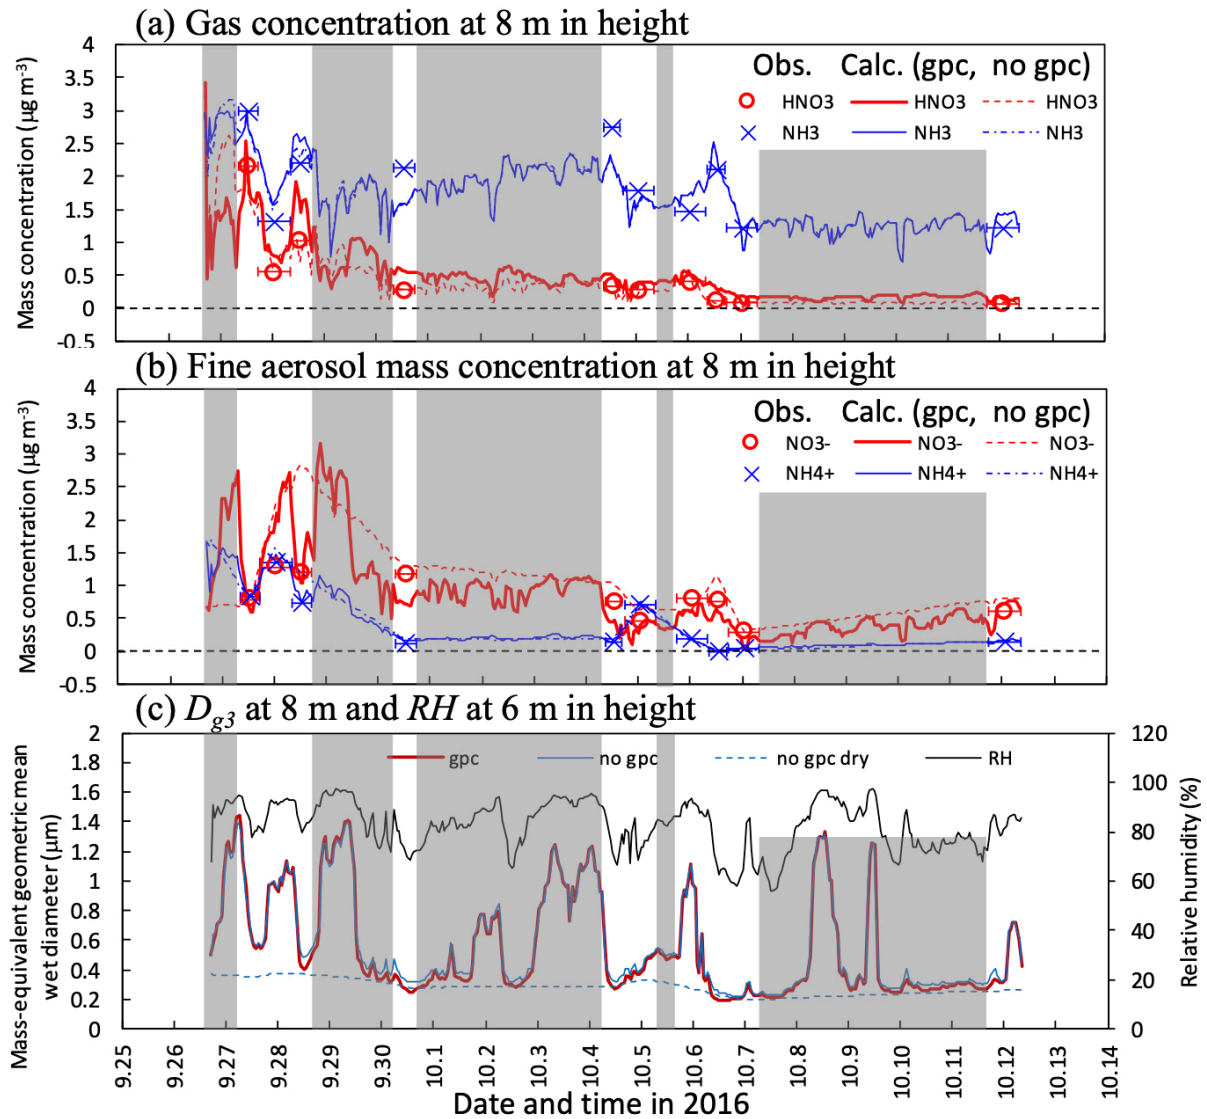

**Figure 6.** Temporal changes in observed and calculated mass concentrations of (a) HNO<sub>3</sub> and NH<sub>3</sub> gases and (b) NO<sub>3</sub><sup>-</sup> and NH<sub>4</sub><sup>+</sup> fine aerosols particles, and mass-equivalent geometric mean wet diameter ( $D_{g3}$ ) at 8 m height from 27 September to 11 October 2016. Calculations for three scenarios ("gpc", "no gpc", and "no gpc dry") are plotted in the figure. Calculated relative humidity ( $RH$ ) at 6 m height in Fig. 3c also appears in (c). Grey shaded areas represent the rain period in which no filter-pack data were available.

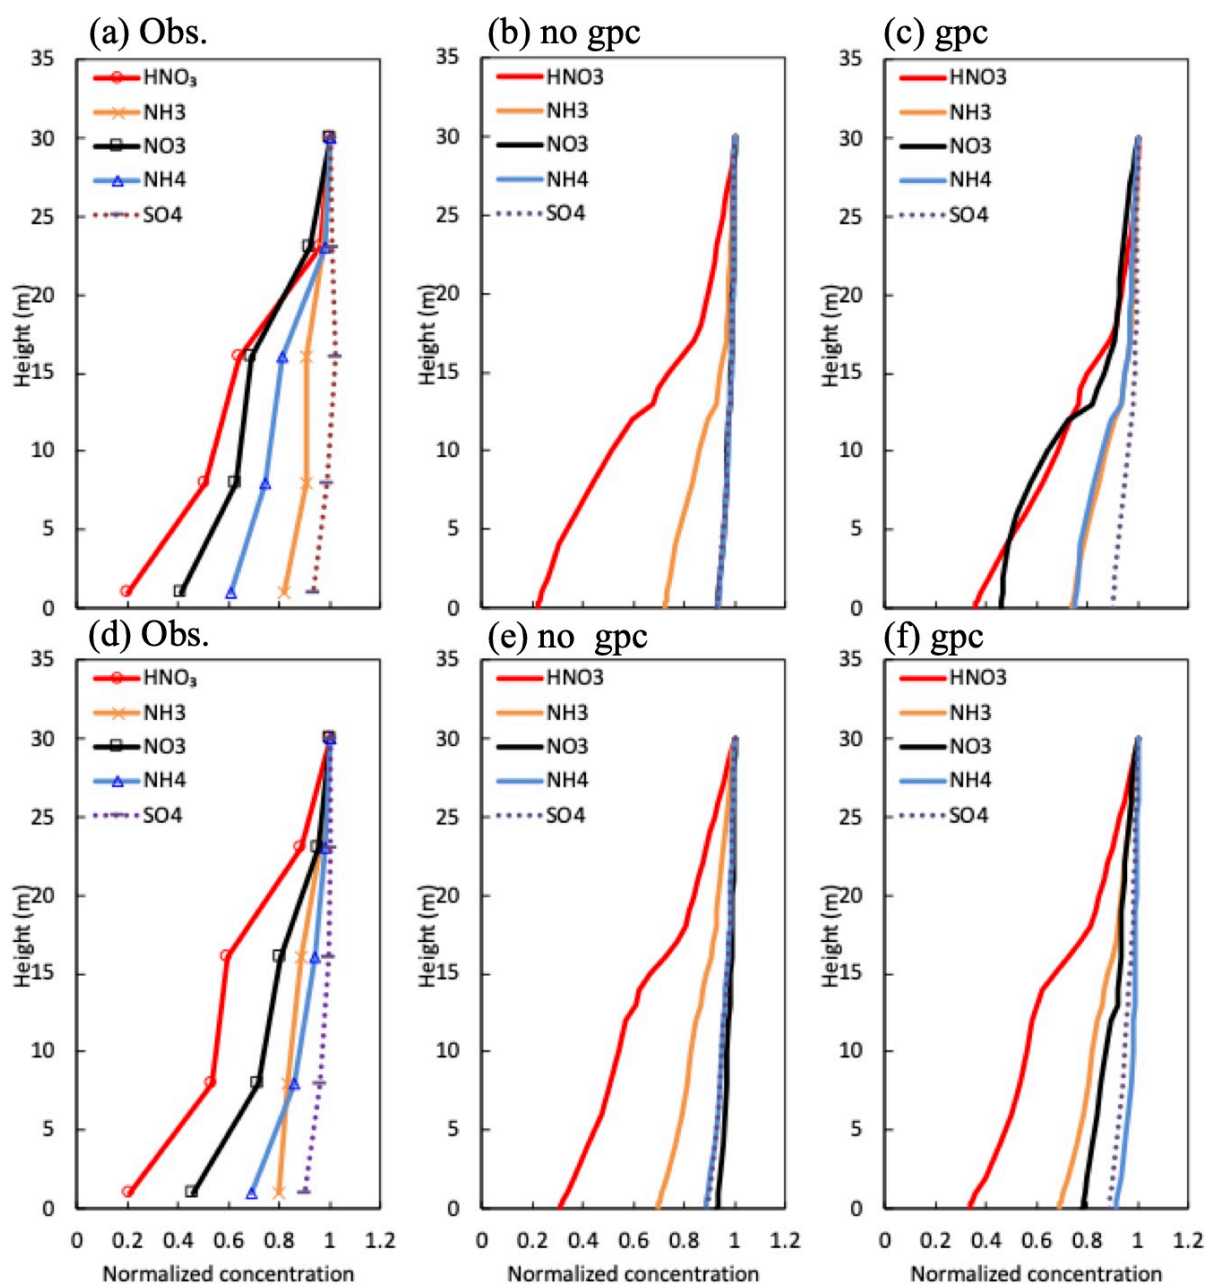

**Figure 7.** Mean vertical profiles in (a) observed and (b) calculated normalized mass concentration in the "no gpc" scenario and (c) the "gpc" scenario for  $\text{HNO}_3$  and  $\text{NH}_3$  gases and  $\text{SO}_4^{2-}$ ,  $\text{NO}_3^-$  and  $\text{NH}_4^+$  fine aerosols-particles (aea-c) during the daytime and (d-f) nighttime from 27 September to 11 October 2016.

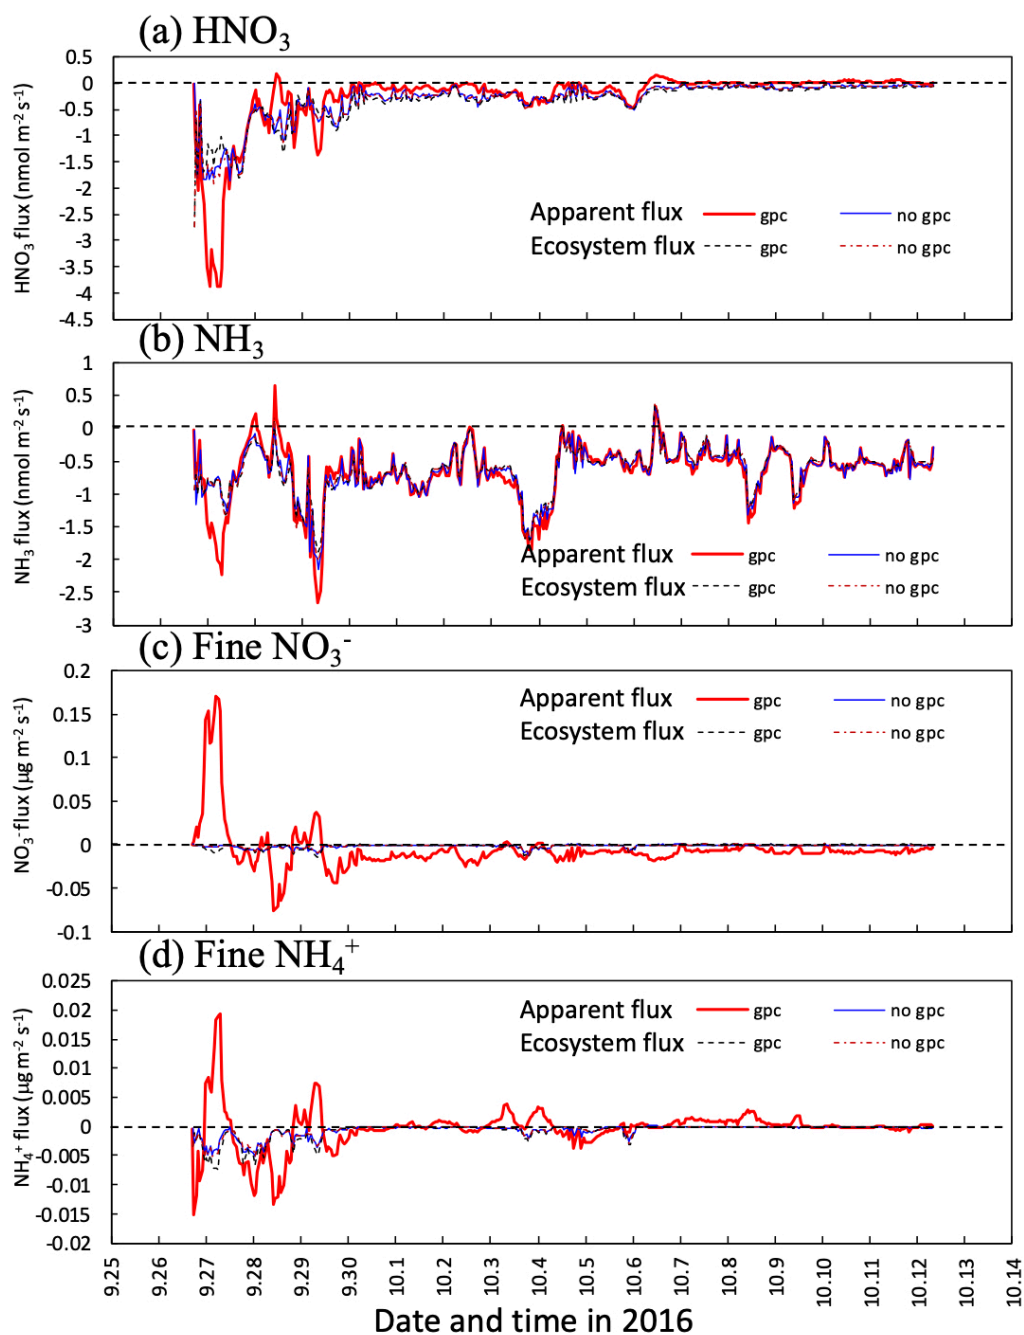

**Figure 8.** Temporal changes in calculated apparent mass flux of (a)  $\text{HNO}_3$  gas and (b)  $\text{NO}_3^-$  and  $\text{NH}_4^+$  fine aerosols from 27-September to 11-October 2016. Calculations particles at 30 m height in two scenarios ("gpc" and "no gpc") from 27 September to 11 October 2016. Fluxes captured by forest (ecosystem flux) are plotted in the figure.



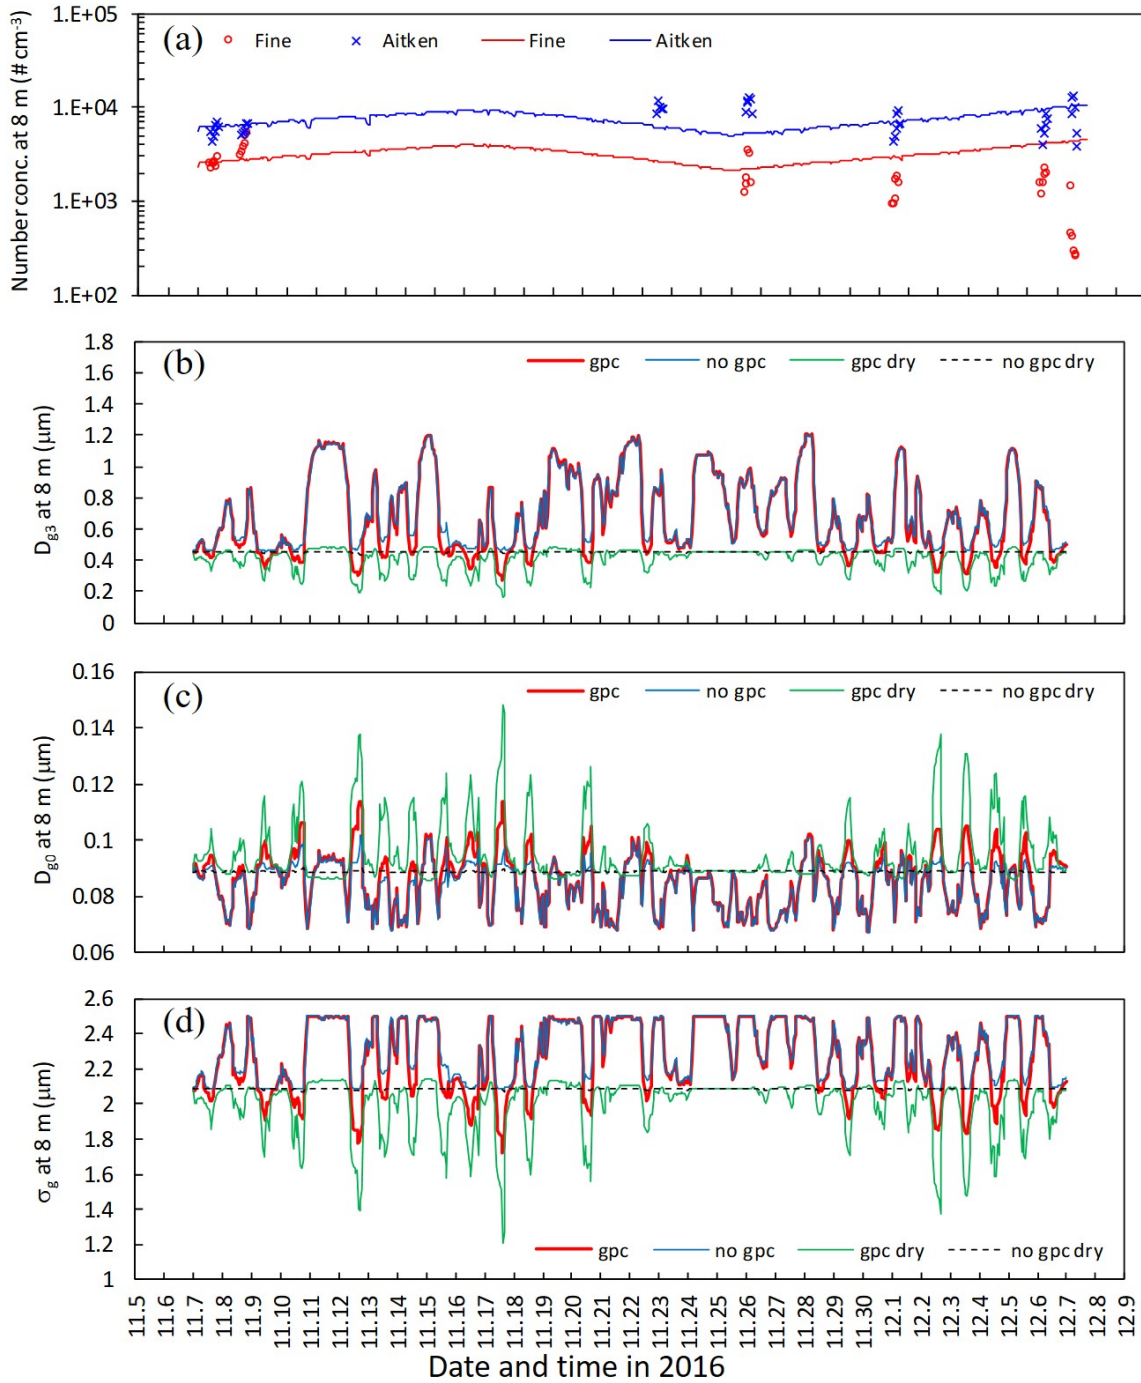

**Figure 9.** Temporal changes in (a) observed and calculated number concentration of fine and Aitken modes, and (b) calculated mass-equivalent ( $D_{g3}$ ) and (c) number-equivalent geometric mean wet diameter ( $D_{g0}$ ), and (d) standard deviation ( $\sigma_g$ ) of fine aerosols-particles at 8 m height from 7 November to 7 December 2016. Calculations for four scenarios ("gpc", "no gpc", "gpc dry", and "no gpc dry") are plotted in the figure.



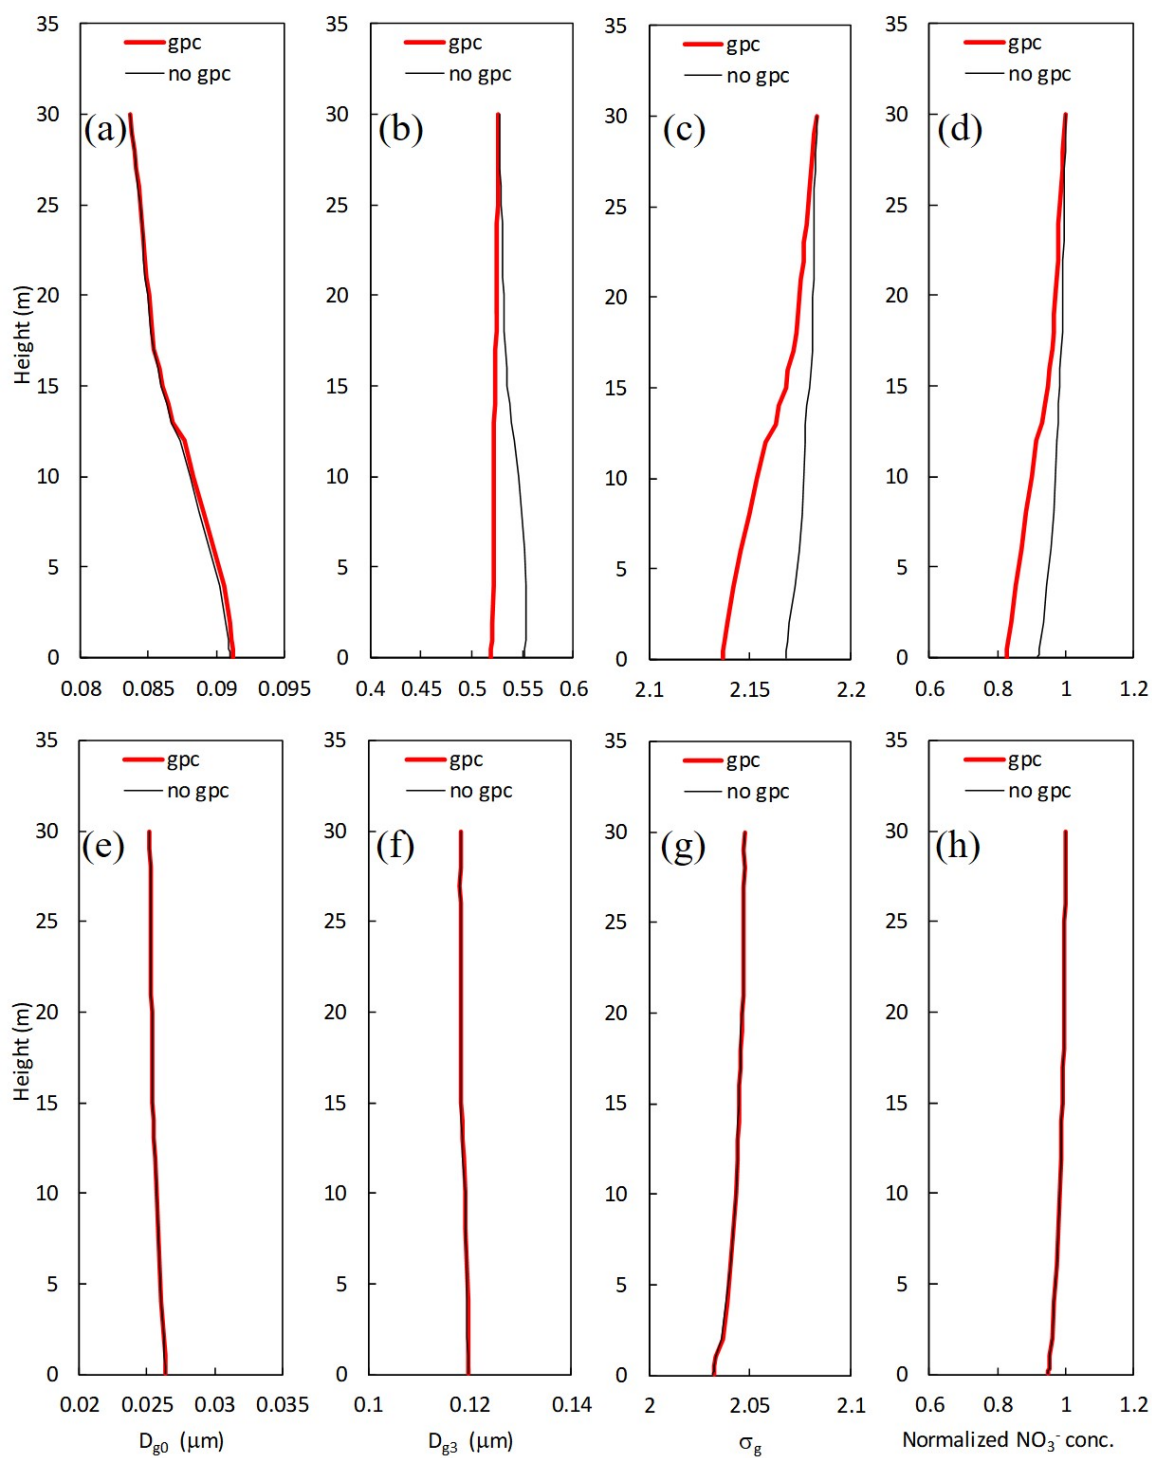

**Figure 10.** Mean vertical profiles for calculated (a, e) number-equivalent ( $D_{g0}$ ) and (b, f) mass-equivalent geometric mean wet diameter ( $D_{g3}$ ), (c, g) standard deviation ( $\sigma_g$ ), and (d, h) normalized mass concentration of  $\text{NO}_3^-$  for (a-d) fine and (e-h) Aitken modes in two scenarios ("gpc" and "no gpc") from 7 November to 7 December 2016.

Differences in (a) observed and (b-e) calculated mean total number concentration between height pairs for 11:00-17:00 on 7, 8, 25, and 30 November 2016. Four calculation scenarios are presented in the figure: (b) "gpc", (c) "no gpc", (d) "gpc dry", and (e) "no gpc dry".

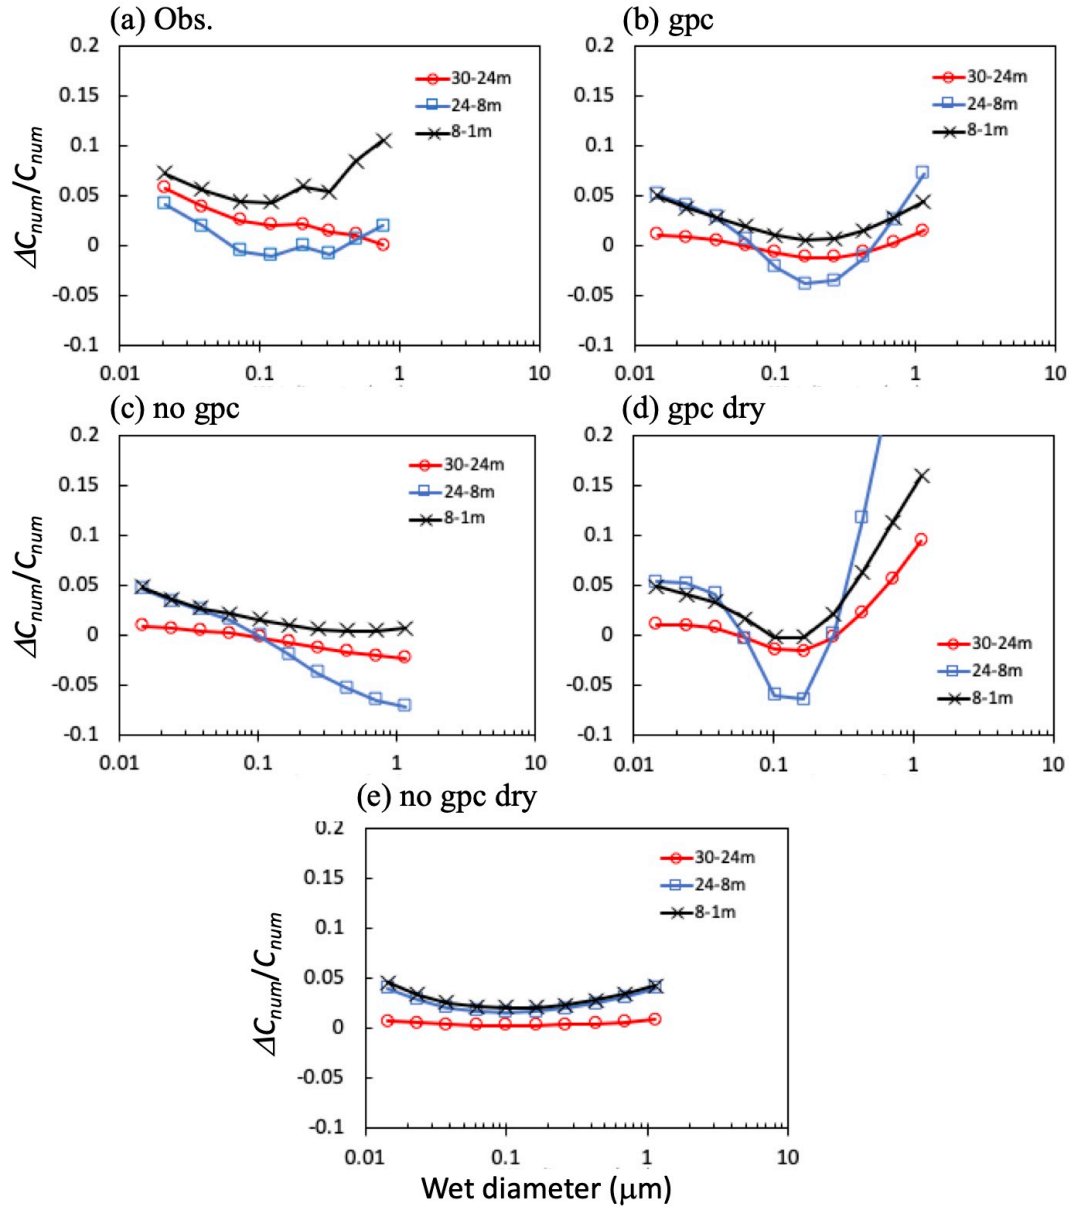

dry".

**Figure 11.** Differences ( $\Delta C_{num}$ ) in (a) observed and (b-e) calculated mean total number concentration ( $C_{num}$ ) between height pairs for 11:00-17:00 on 7, 8, 25, and 30 November 2016. Four calculation scenarios are presented in the figure: (b) "gpc", (c) "no gpc", (d) "gpc dry", and (e) "no gpc dry".

Relationship between relative humidity ( $RH$ ) at 30 m height and "gpc" to "no gpc" ratios of calculated half-hourly fluxes ( $F_{gpc}/F_{nogpc}$ ) of (a, d)  $\text{HNO}_3$  gas and (b, e)  $\text{NO}_3^-$  and (c, f)  $\text{NH}_4^+$  fine aerosols over the canopy from 27 September to 11 October 2016. Red lines represent the situation in which  $F_{gpc} = F_{nogpc}$ . (d) through (f) plot the same variables as (a) through (c), but under dry conditions ( $RH < 80$

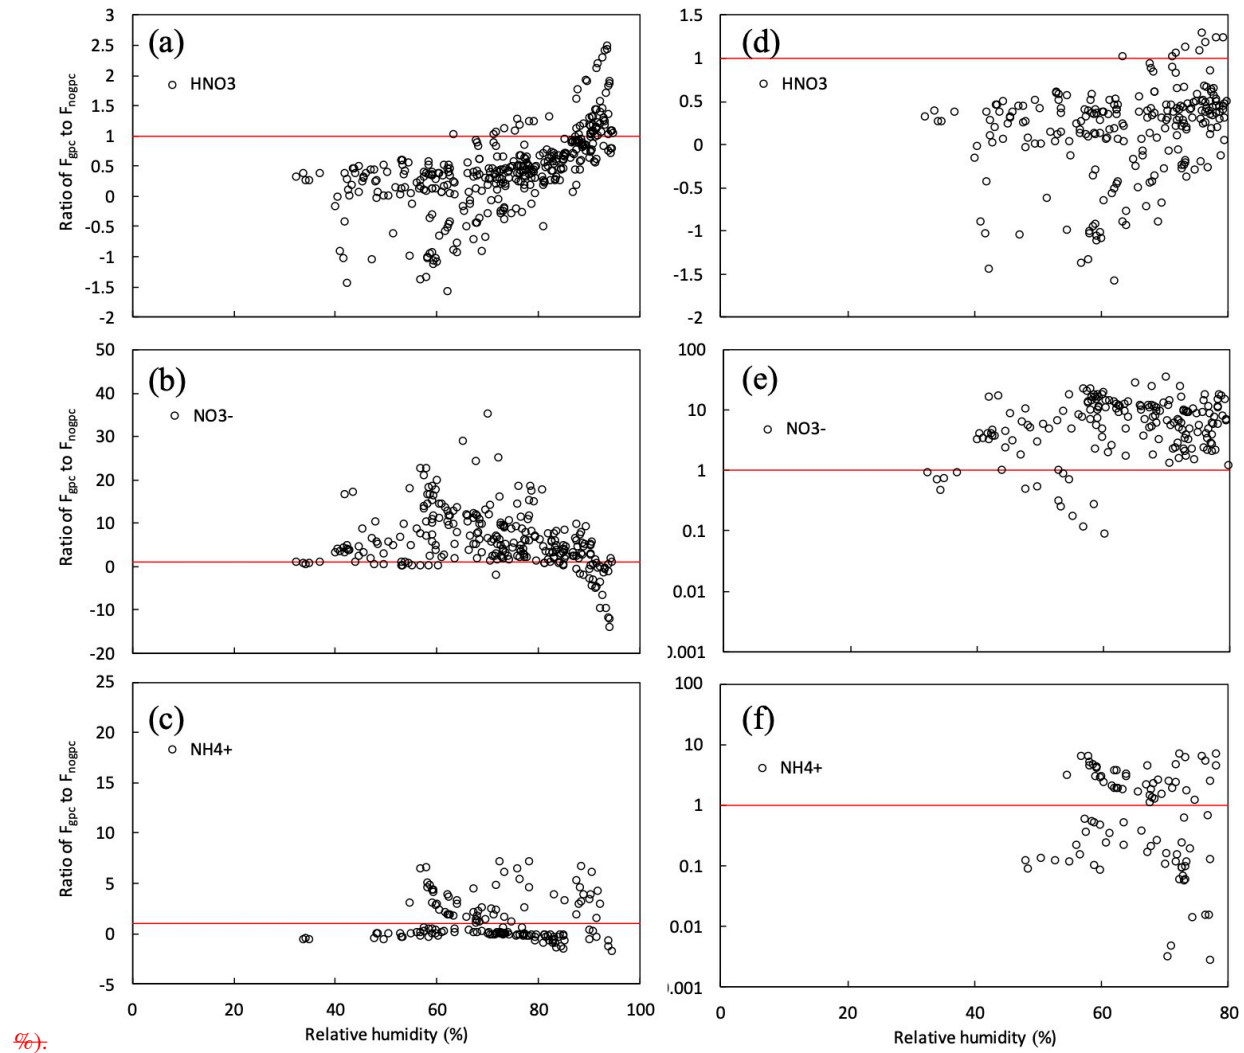

**Figure 12.** Relationship between relative humidity ( $RH$ ) at 30 m height and "gpc" to "no gpc" ratios of calculated half-hourly fluxes ( $F_{gpc}/F_{nogpc}$ ) of (a, d)  $\text{HNO}_3$  gas and (b, e)  $\text{NO}_3^-$  and (c, f)  $\text{NH}_4^+$  fine particles over the canopy from 27 September to 11 October 2016. Red lines represent the situation in which  $F_{gpc} = F_{nogpc}$ . (d) through (f) plot the same variables as (a) through (c), but under dry conditions ( $RH < 80$  %).

**Table 1.** Summary of input data, and initial and boundary conditions for SOLVEG simulation setup; FP: filter-pack measurements, ELPI+: ELPI+ measurements,  $f_{ie}$ : the volume fraction of inorganic compounds. It should be noted that the gaps between FP in rain days of the early autumn period were linearly incorporated for simulations.

|                              | Early autumn                           | Late autumn                     |
|------------------------------|----------------------------------------|---------------------------------|
| Period                       | 26 September-11 October 2016           | 7 November-7 December 2016      |
| Target of simulation         | Fine inorganic mass concentration/flux | Total number concentration/flux |
| Upper boundary condition     |                                        |                                 |
| Inorganic mass concentration | FC Day/night (without rain days)       | FC Weekly (continuous)          |
| Particle size distribution   | Fitting of ELPI+ (Fig. 1a)             |                                 |
| $f_{ie}$                     | FC and Hachiouji station               | FC and ELPI+                    |
